# Supplementary material for: Hox genes control homocercal caudal fin development and evolution
Source: PubMed Central journal article supplement — Sci Adv. 2024 Jan 19;10(3):eadj5991. doi: 10.1126/sciadv.adj5991 (PMC10798566; doi:10.1126/sciadv.adj5991), 2024-01-19
Supplement: sciadv.adj5991_sm.pdf [file sciadv.adj5991_sm.pdf]

Supplementary Materials for  
***Hox* genes control homocercal caudal fin development and evolution**

Nicolás Cumplido *et al.*

Corresponding author: Nicolás Cumplido, [nicump@gmail.com](mailto:nicump@gmail.com)

*Sci. Adv.* **10**, eadj5991 (2024)  
DOI: 10.1126/sciadv.adj5991

**The PDF file includes:**

Supplementary Text  
Figs. S1 to S8  
Tables S1 to S3  
Legends for movies S1 and S2  
References

**Other Supplementary Material for this manuscript includes the following:**

Movies S1 and S2

## Supplementary Text

### Expression patterns of zebrafish *hox13* genes

*Tail.* —At 1 dpf, all six *hox13* paralogs were expressed in the tail bud, with varying anterior limits of expression. The *hoxc* paralogs *c13a* and *c13b*, had the broadest expression domains, which extended more anteriorly. Particularly, *c13a* expression extended into the fin fold. The *hoxa* and *b* paralogs, *a13a*, *a13b* and *b13a*, showed similar and more posterior expression domains, while the *hoxd* paralog, *hoxd13a*, was confined to the posterior tip of the tail.

At 2 dpf, all *hox13* genes, except for *d13a*, were expressed in the tail with distinct expression patterns either in the mesenchyme around the notochord, the fin fold and/or the neural tube (Fig. S1). The *hoxc* paralogs had broader expression domains that overlapped both *hoxa* paralogs and the *b13a* gene expression, while the expression patterns of *hoxa* paralogs versus *b13a* did not overlap and were confined to either the anterior or posterior portion of the tail, respectively (Fig. S1). Overall, the *b13a*, *c13a*, and *c13b* paralogs had strong labeling in the tail, while the expression of *a13a* and *a13b* paralogs was considerably fainter compared to their expression in the pectoral buds.

By 3 dpf, expression of only the *a13b*, *b13a*, *c13a* and *c13b* genes was detected in the tail, with varying expression domains (Fig. S2). In the ventroposterior portion of the notochord, *a13b* had the most anterior expression, followed by *hoxc* paralogs and then *b13a*. Dorsally, the most anterior domain was observed in *hoxc* paralogs, followed by *b13a* and *a13b*. At 4 dpf, *a13b*, *b13a* and *c13a* genes were detected, with the expression of *a13b* much fainter compared to its expression in the pectoral fins. Additionally, when considering the PU/U boundary (black arrow, Fig. S2) ventral expression of *a13b* was located at the PU/U boundary, while *c13a* was also expressed at this boundary but reaching almost the middle portion of the ural region. Conversely, *b13a* was expressed in the posterior end of the ural region. Dorsally, all these genes were expressed in the preural region, with the *b13a* gene expressed also in the dorsal portion of the ural region.

Between 1 and 3 dpf, the expression patterns of the two *hoxc13* ohnologs, *c13a* and *c13b* were highly similar, but *c13a* expression persisted longer than *c13b* expression (Figs. S1, S2), as previously reported (26).

*Pectoral fins.* —Consistent with previous studies (32, 34), we detected expression of *hoxa* and *hoxd* paralogs in the pectoral fin at 2, 3 and 4 dpf. At 2 dpf, these genes were expressed at the distal mesenchyme of the pectoral fin bud, with *d13a* expression confined to its posterior region (Fig. S1). At 3 dpf, *a13a* lost its proximal mesenchymal expression, and instead was expressed only in the distal fin fold (34), resembling the pattern observed in the posterior portion of the tail between 1 and 2 dpf (Fig. S1). We did not detect expression of *b13a* or any of the *hoxc* paralogs in the pectoral fin at any time point.

*Proctodeum/Cloaca.* —The proctodeum or embryonic cloaca is an ectodermal derivative that invaginates and fuses with the hindgut to form the anus. As previously reported, *a13b* (96) and *d13a* (97) were expressed in this region, as well as *a13a*, suggesting a *hoxa/d* expression pattern in this tissue. Similar to the tail and pectoral fin, *d13a* expression was located more posteriorly than other *hox13* paralogues.

*Pronephric duct.* —The pronephric duct is a component of the embryonic urogenital duct that arises from the lateral plate mesoderm. It consists of two bilateral ducts located dorso-lateral to the gut, which eventually terminate at the urogenital pore. Previous studies have shown that *a13b* is expressed in this region (96), and our findings confirm this expression from 1– to 4–dpf (Figs. S1, S2A). We also observed the expression of *c13b* in the same region, which persisted from 1 to 3 dpf (Figs. S1, S2A).

*1.5 Hindgut.* — The hindgut is the most posterior section of the digestive tract that fuses during embryonic development with the proctodeum, creating a functional gastrointestinal tube. Previous studies in zebrafish have only reported the expression of *a13a* in this region (96). We observed *a13a* expression in the most posterior portion of the hindgut at 1 dpf. Additionally, we report a previously unobserved expression of *c13a* in this region, extending further anteriorly (Fig. S1). Between 2 and 4 dpf, we observed strong *in situ* labeling of *a13a*, *b13a* and *c13a* in the hindgut, with transient inclusion of *a13b* at 3 dpf (Fig. S2A). Hence, the *hoxa*, *b* and *c* expressions in the hindgut resembled the activation of the same genes during tail development (Fig. S2).

## 2. List of characters, their coding, and comments

Character 1. Number of preural vertebrae: more than six [0]; six or less [1].

Comments—Original character.

Character 2. Ural region in adults including: more than two ural centra (polyural condition) [0]; commonly two (or less) ural centra (diural condition) [1]

Comments—The diural caudal skeleton was proposed as a synapomorphy of teleosts by Patterson (98). For further explanation on this character and the homology problems involved see Schultze and Arratia (4, 7, 73), Wiley et al. (82) and Cumplido et al. (40). Character 127 in Arratia (45) and 147 in Arratia (44).

Character 3. Ural neural arches modified as uroneurals: ural neural arches unmodified [0]; all or some of the last ural neural arches modified as uroneurals [1]

Comments—Modified from Arratia (43). This character has been consistently used in systematic studies of teleosts. See for instance: Patterson (42, 98), Brito (99), Grande and Bemis (71), Schultze and Arratia (4, 7, 73, 100), Arratia and Schultze (74), and Arratia (43, 45, 101–103). Character 132 in Arratia (45) and 152 in Arratia (44).

Character 4. Preural vertebrae 3 of adult individuals: with haemal arches autogenous or articulating with the centrum [0]; fused with the centrum [1].

Comments—Modified from Arratia (43), which also included the preural vertebrae 2. Character 121 in Arratia (45) and 141 in Arratia (44).

Character 5. Neural spine of preural centrum 1: long, close or extending to the dorsal margin of the body [0]; short or absent [1].

Comments—From Arratia (43). Character 123 in Arratia (45) and 143 in Arratia (44).

Character 6. Number of principal caudal rays: fewer than 19 [0]; 20 to 30 [1]; 19 [2]; more than 40 rays [3].

Comments—Modified from Patterson (98), Patterson and Rosen (104), and Arratia (44, 45, 101). Character 148 in Arratia (45) and 173 in Arratia (44).

Character 7. Hypurals 2 and 3: without a space between them [0]; with a space (hypural diastema) between them; non-applicable, e.g., fusion of hypurals [-].

Comments—From Arratia (43). Character 141 in Arratia (45) and 161 in Arratia (44).

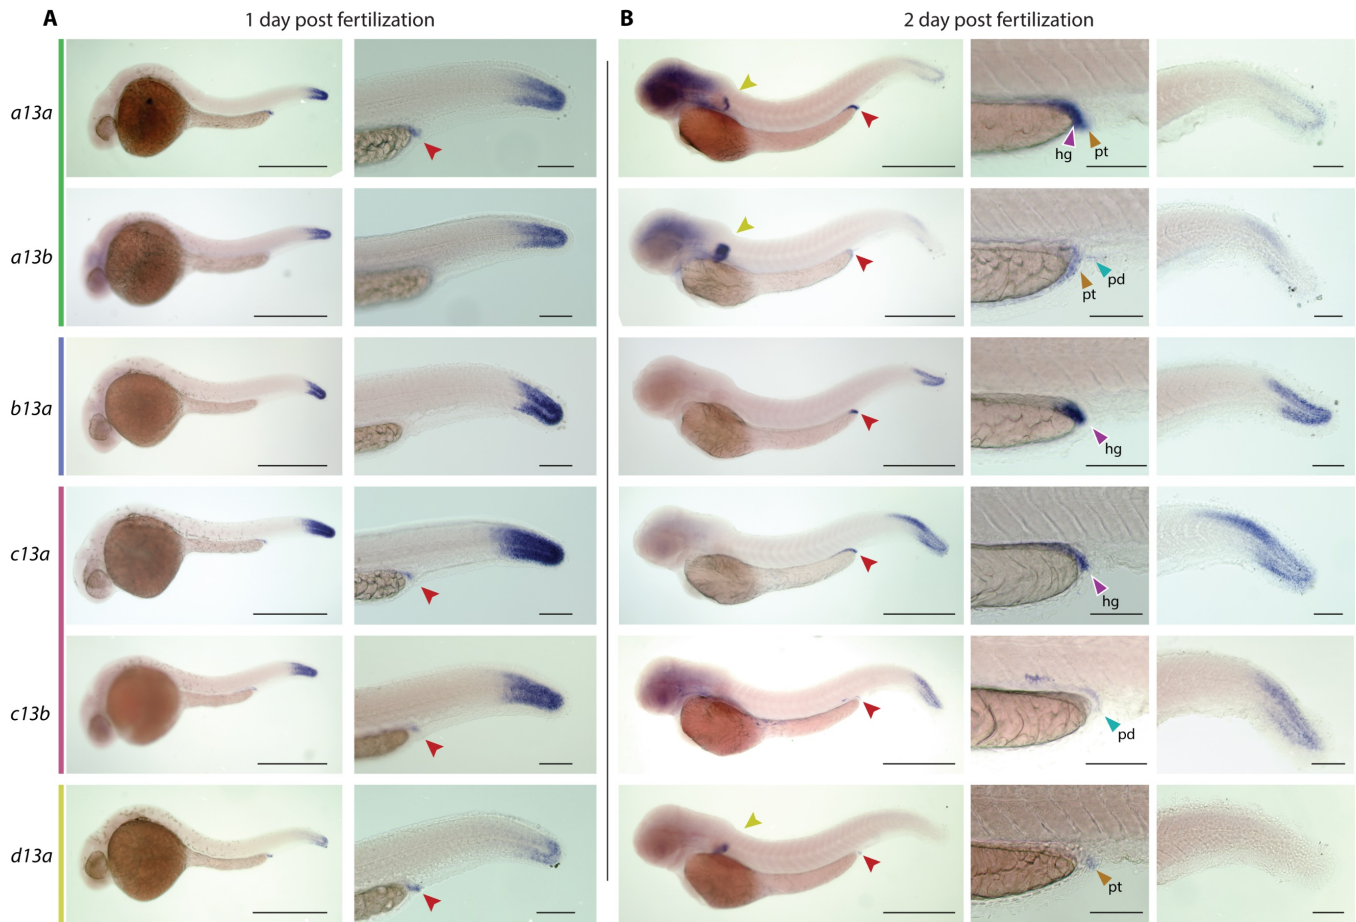

**Fig. S1. Gene expression patterns of zebrafish *hox13* paralogs at 1 and 2 dpf.** *In situ* hybridizations were performed against *a13a*, *a13b*, *b13a*, *c13a*, *c13b*, and *d13a* to visualize their expression patterns. **(A)**, 1 dpf zebrafish larvae. Left panels, whole larvae in lateral view, scale bar at 0.5 mm. Right panels provide a close-up of the tail, scale bar at 0.1 mm. **(B)**, 2 dpf zebrafish larvae. Left panels, whole larvae in lateral view, scale bar at 0.5 mm. Middle panels close-up to the anus, right panels close-up to the tail. Middle and right panel scale bars at 0.1 mm. For **A, B**, The yellow arrowhead points at the expression in the pectoral fins, the red arrowhead at the posterior end of either the hindgut (hg, purple arrowhead), pronephric duct (pd, light blue arrowhead), or proctodeum/cloaca (pt, orange arrowhead).

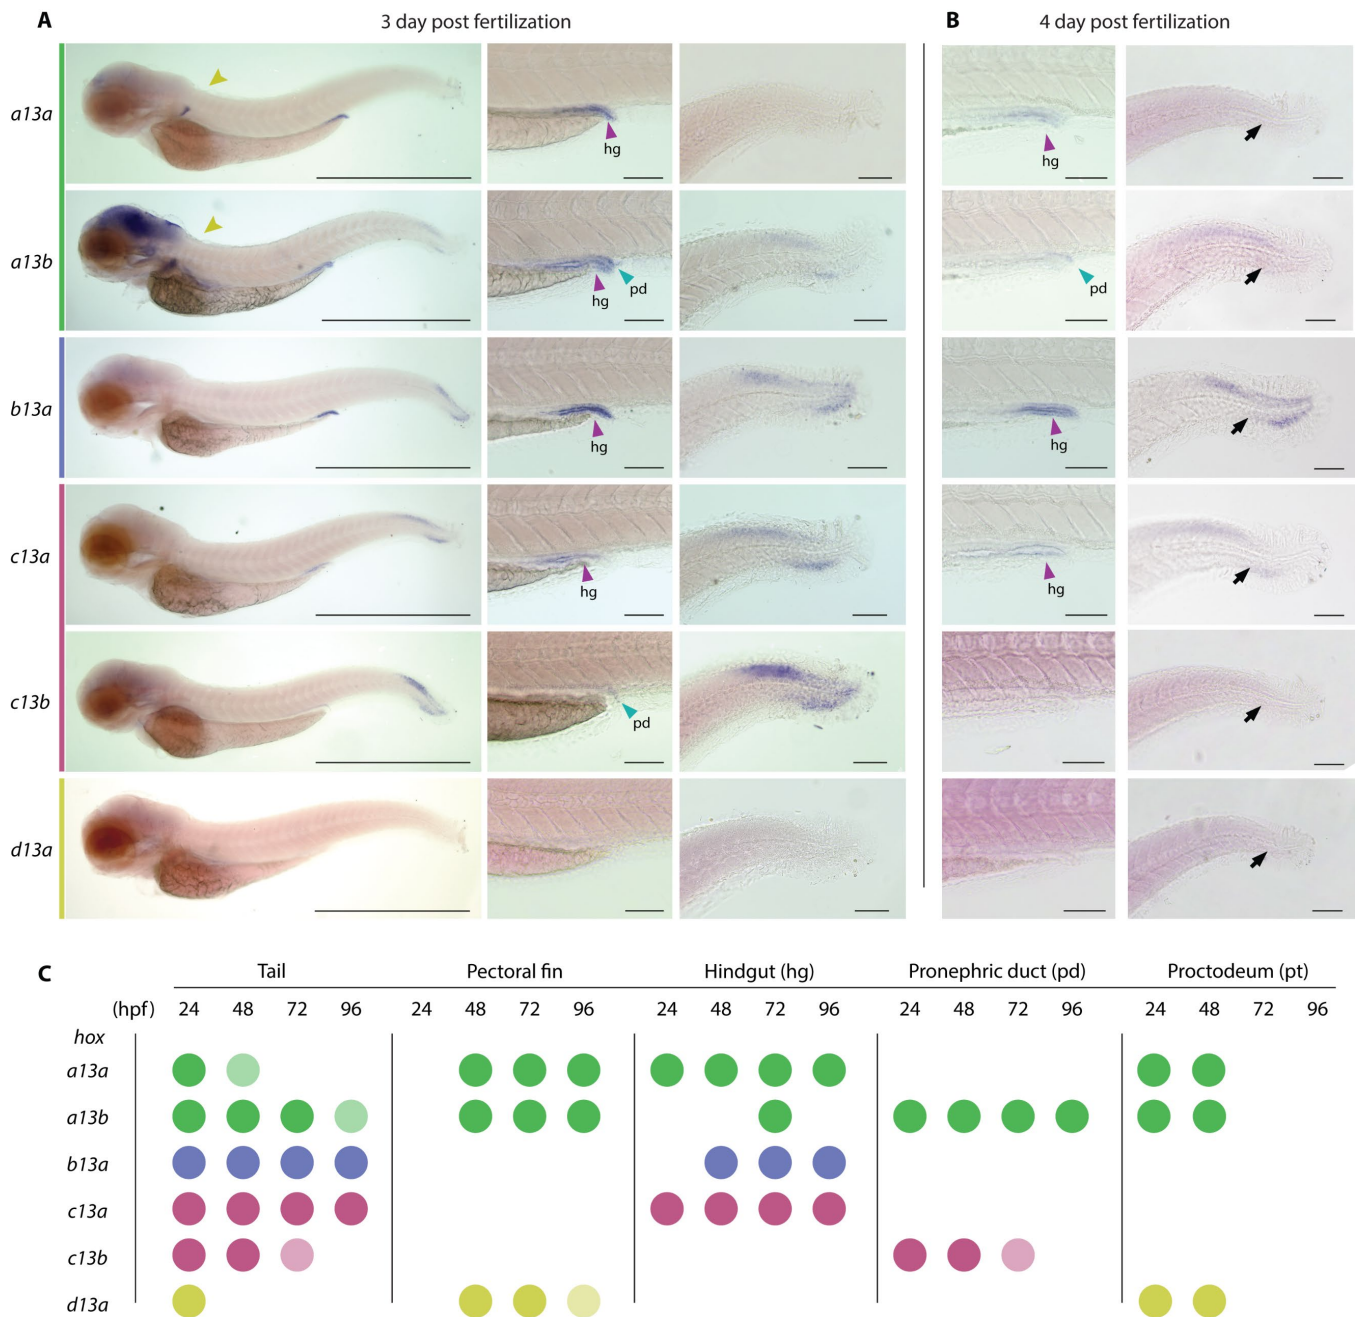

**Fig. S2. Gene expression patterns of *hox13* zebrafish paralogs at 3 and 4 dpf.** *In situ* hybridizations were performed against *a13a*, *a13b*, *b13a*, *c13a*, *c13b*, and *d13a* at 3 and 4 dpf to visualize their expression patterns. (A), 3 dpf zebrafish larvae. Left panels show larvae in lateral view, scale bar at 0.5 mm. Middle panels provide a close-up to the anus, scale bar at 0.1 mm. Right panels provide a close-up to the tail, scale bar at 0.1 mm. (B), 4 dpf zebrafish larvae. Left panels provide a close-up to the anus, scale bar at 0.1 mm. Right panels provide a close-up to the tail, scale bar at 0.1 mm. For A, B, yellow arrowheads point at the expression in the pectoral fins, purple arrowheads highlight at the expression in the hindgut (hg), and light blue arrowheads show *hox* gene expression in the pronephric duct (pd). Black

arrows indicate the position of the end of the caudal artery that delimits the position of the PU/U boundary. (C), Summary of the expression patterns of all *hox13* paralogs in different tissues over time.



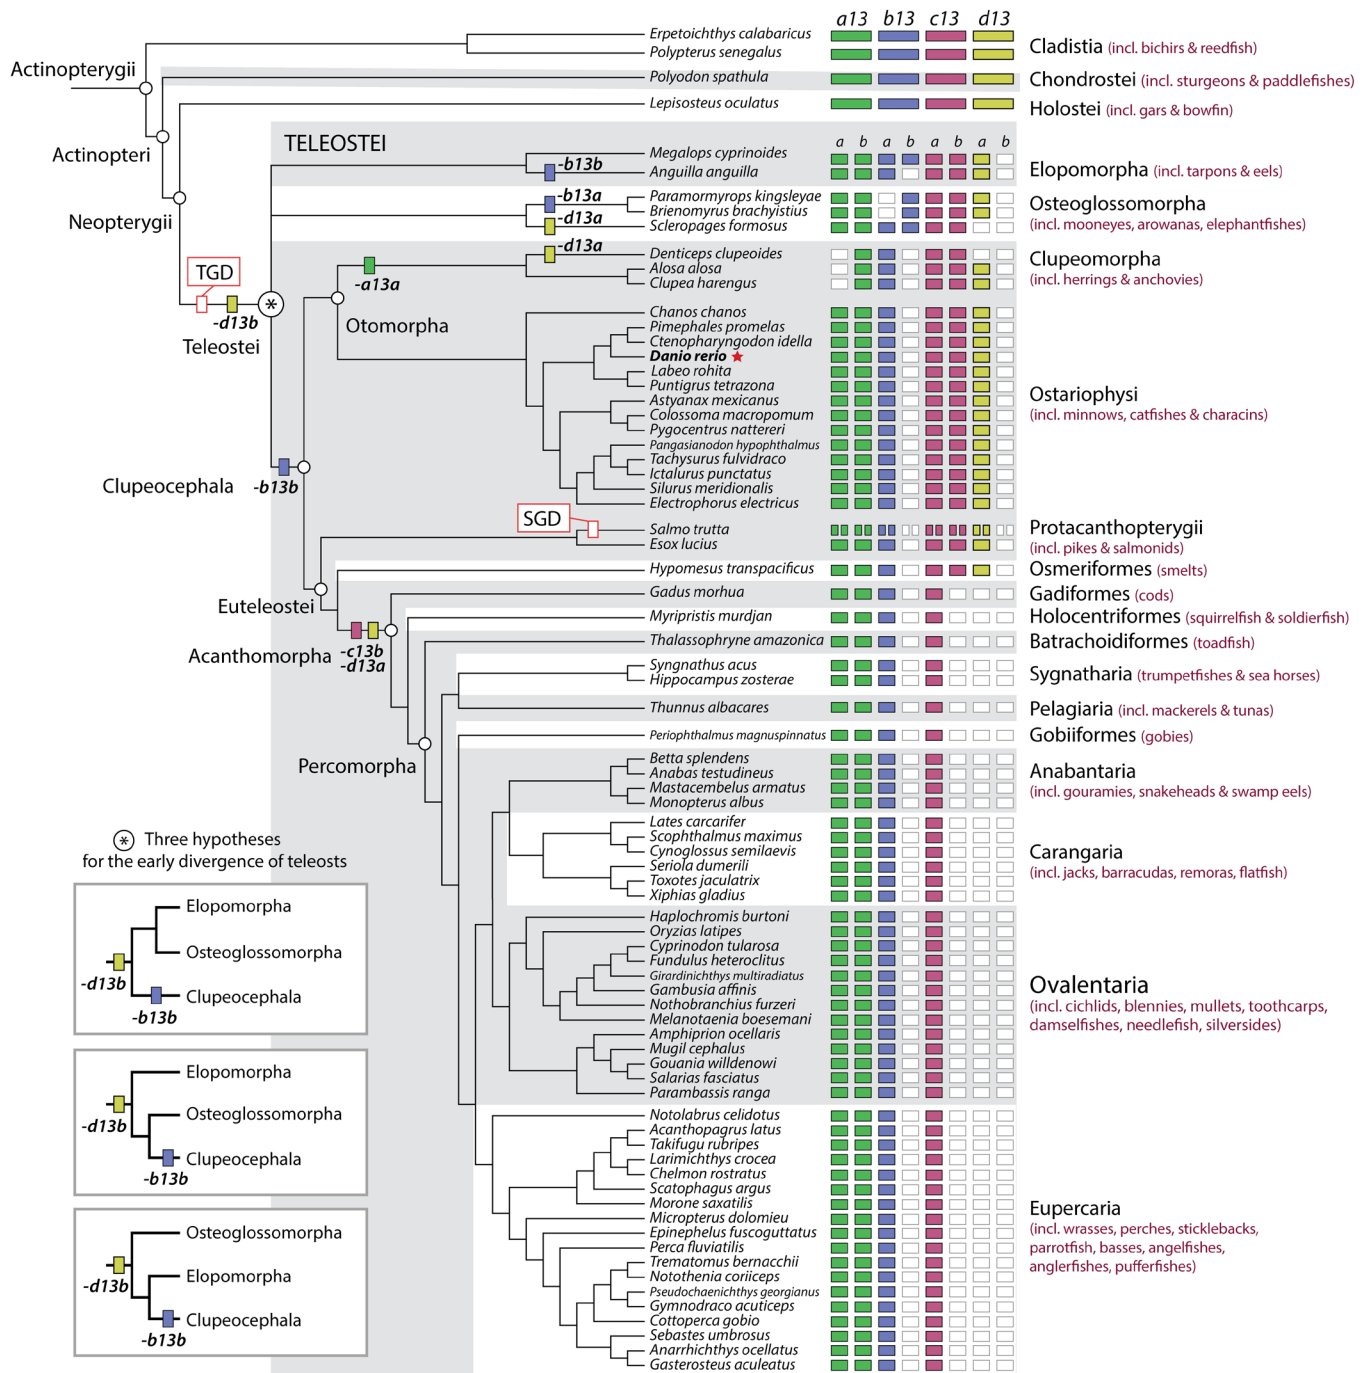

**Fig. S3. Reconstruction of *hox13* gene repertoire evolution in actinopterygians.** The presence vs absence of each *hox13* gene was determined by manually searching for each *Hox* cluster in annotated genome assemblies of actinopterygians available on NCBI (see Table S1). The simplified phylogeny is based on Betancur-R et al. (105), with the base of the teleosts resolved as a polytomy. Boxed, at the bottom left of the figure, are the three possible scenarios of the most basally diverging group, including Elopomorpha (105), Osteoglossomorpha (98) or Clupeocephala (106) although these do not affect the interpretations of *hox13* gene evolution. The presence of each gene is indicated by a coloured rectangle, green for *hoxa13*, blue for *hoxb13*, red for *hoxc13*, and yellow for *hoxd13* orthologs. Empty (white)



rectangles indicate the absence of the respective gene. Zebrafish (*Danio rerio*) is in bold and indicated with a red star. TGD, teleost genome duplication; SGD, salmonid genome duplication.

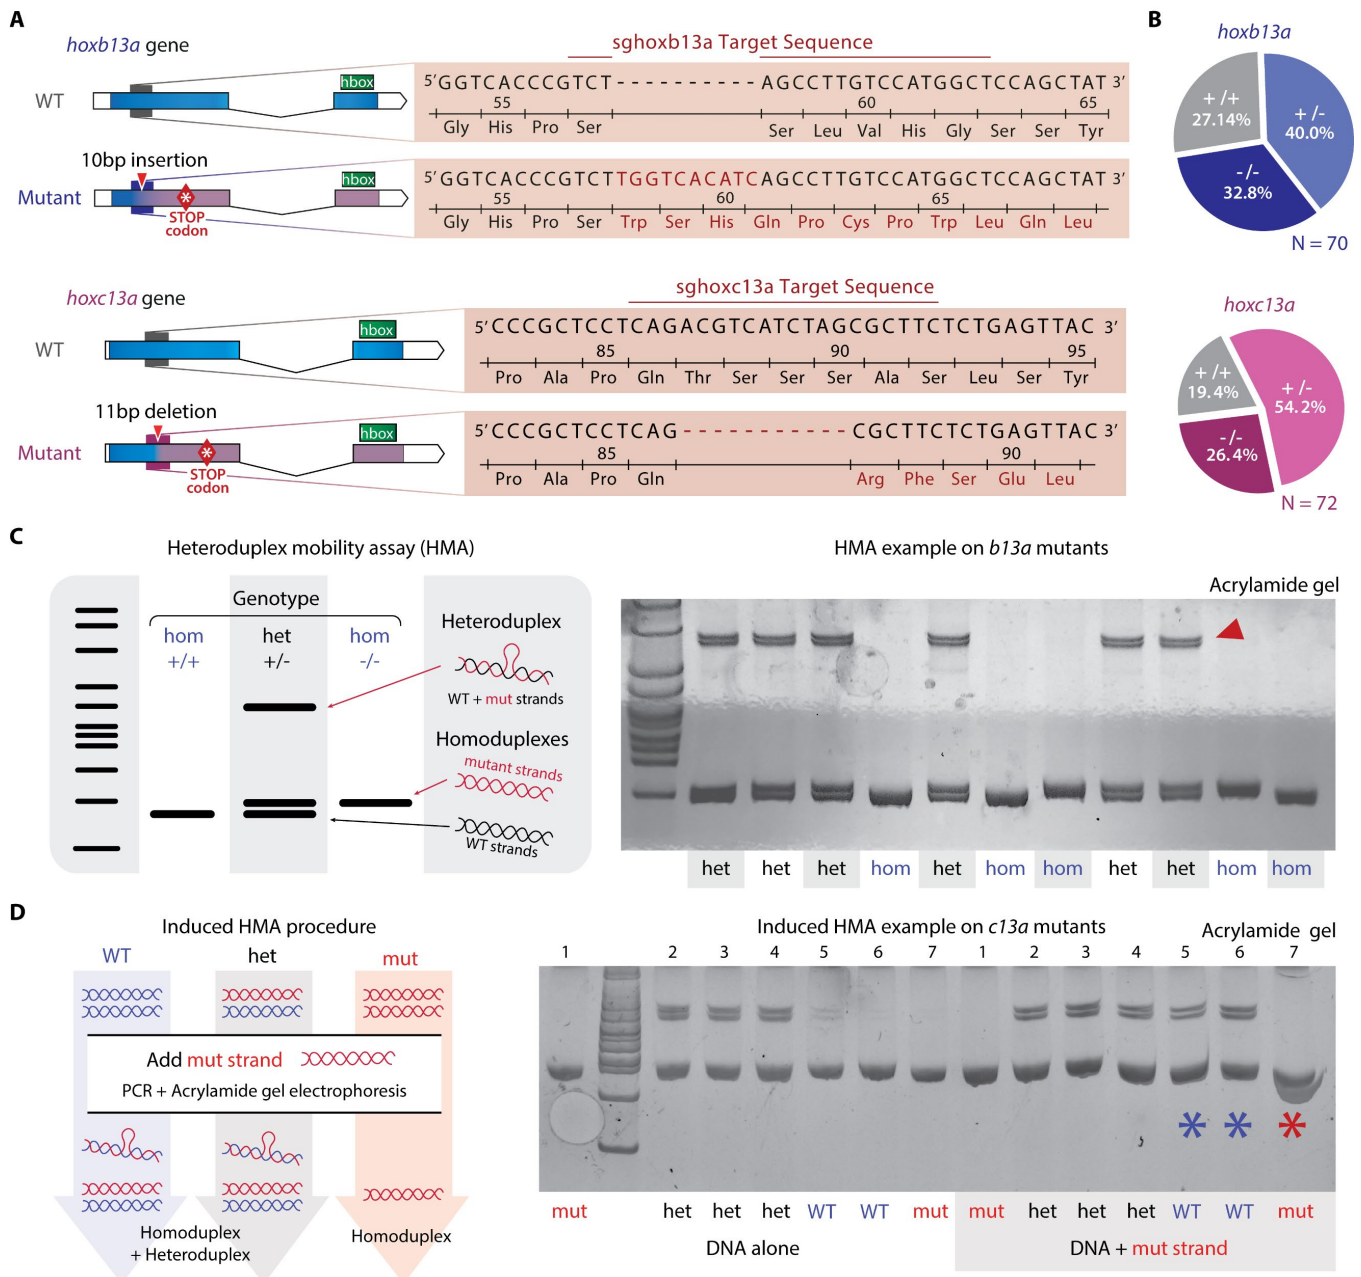

**Fig. S4. Description of *b13a* and *c13a* gene mutations and genotyping procedure.** (A), Description of the 10bp insertion mutation in *b13a* and the 11-bp deletion in *c13a* genes, both of which were generated using CRISPR/Cas9. Both mutations cause a frameshift in the first exon resulting in an early stop codon. The DNA binding homeobox (hbox) is encoded by the second exon in both genes. (B), An incross of heterozygous *b13a* and *c13a* mutant zebrafish, produced a mendelian ratio of inheritance for the more than 70 F2 individuals tested. (C), Genotyping of both clutches was performed using a heteroduplex mobility assay. In this assay, the presence of strands of different sizes in heterozygous fish leads to the formation of a heteroduplex, which delays DNA migration during acrylamide gel electrophoresis (red arrowhead). (D), Homozygous mutants were identified by adding homozygous mutant DNA to each unknown sample. If the unknown sample was from a wild type or heterozygous individual, the presence of the mutant DNA would cause a heteroduplex mobility shift, which could be

detected by the presence of a delayed band in the acrylamide gel (blue asterisk). Homozygous mutant samples, on the other hand, would not generate this band, and were identified by the absence of the delayed band (red asterisk).

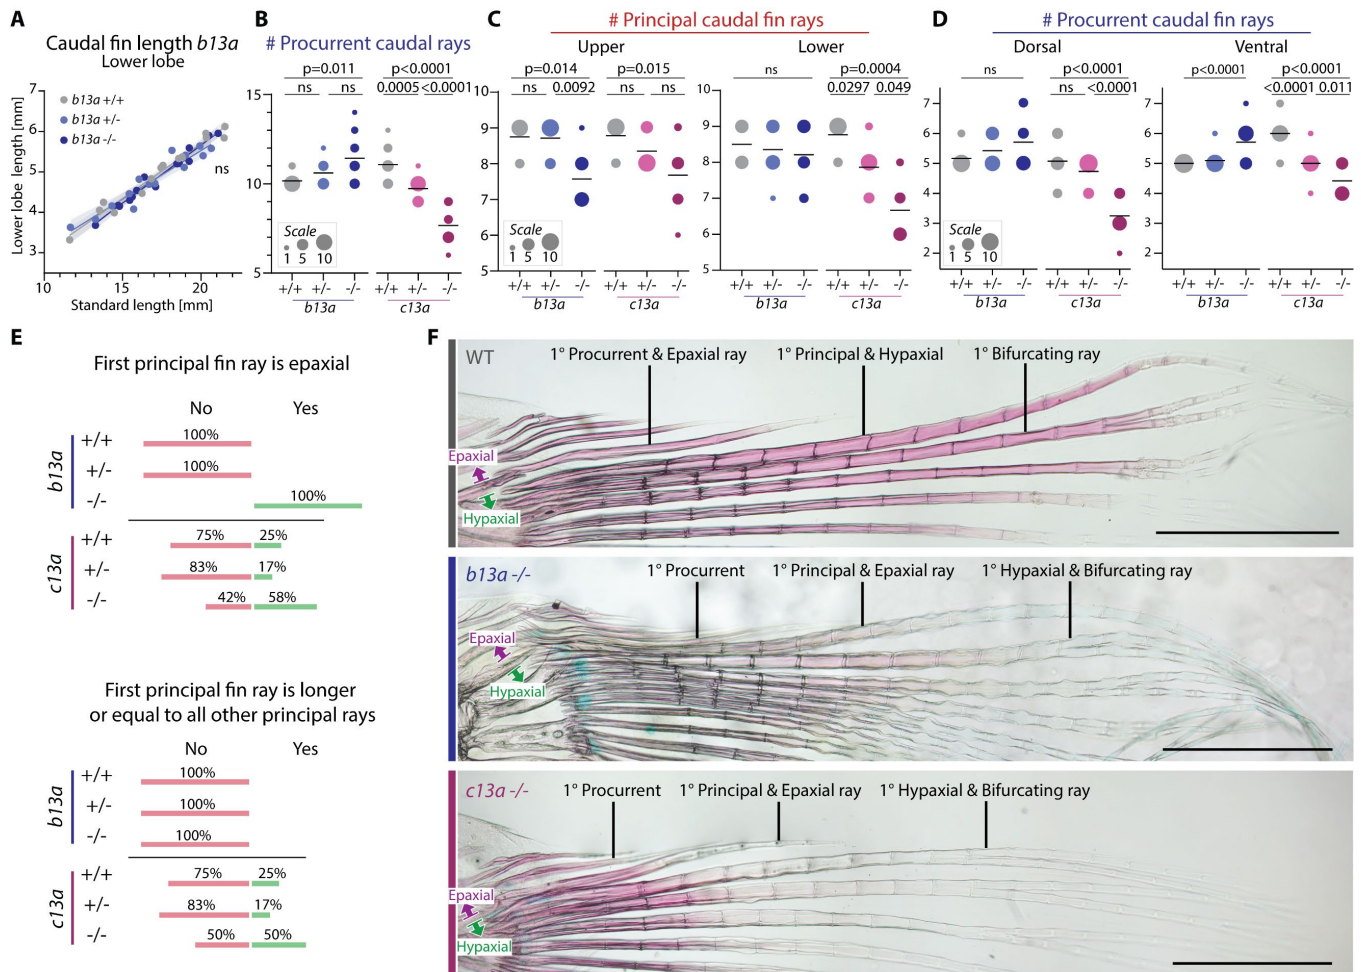

**Fig. S5. Quantification of caudal fin phenotypes in *b13a* and *c13a* mutants.** (A), Lower lobe length relative to standard length in wild-type, heterozygous and homozygous *b13a* mutant siblings ( $n=14$ ). ANCOVA indicated no variation in lower lobe length between genotypes ( $F_{(2,38)}=1.076$ ,  $p=0.3510$ ). Shaded area represents the 95% confidence interval around the regression line. For B–E,  $n = b13a^{+/+}:12$ ,  $b13a^{+/-}:14$ ,  $b13a^{-/-}:14$ ,  $c13a^{+/+}:13$ ,  $c13a^{+/-}:15$  and  $c13a^{-/-}:12$ . Each graph presents the mean, and the circle size is proportional to the number of individuals. (B), Procurent ray number in both mutants. Poisson regressions revealed significant increases in procurent ray number in *b13a* mutants ( $\chi^2_{(2)}=15.04$ ,  $p=0.0005$ ). ANOVA revealed significant reduction in procurent ray number for *c13a* mutants ( $F_{(2,37)}=51.18$ ,  $p<0.0001$ ). Multiple comparisons indicated a *c13a* gene-dosage effect. (C), Principal ray number separated into upper and lower lobes in both mutants. Poisson regressions revealed a significant increase in upper principal ray number in *b13a* mutants ( $\chi^2_{(2)}=17.15$ ,  $p<0.0001$ ) but not in lower principal ray number ( $\chi^2_{(2)}=0.82$ ,  $p=0.66$ ). Poisson regressions revealed a significant reduction in both upper and lower lobes of *c13a* mutants (*upper*:  $\chi^2_{(2)}=10.95$ ,  $p<0.0042$ ; *lower*:  $\chi^2_{(2)}=25.40$ ,  $p<0.0001$ ). (D), Procurent ray number separated into dorsal and ventral series in both mutants. Poisson regression revealed a significant increase in ventral procurent rays in *b13a* mutants ( $\chi^2_{(2)}=14.75$ ,  $p=0.0006$ ) but not dorsal procurent rays ( $\chi^2_{(2)}=4.68$ ,  $p=0.089$ ). ANOVA revealed a significant decrease in procurent ray number in both upper and lower procurent rays in *c13a* mutants (*upper*:  $F_{(2,37)}=30.81$ ,  $p<0.0001$ ; *lower*:  $F_{(2,37)}=33.58$ ,  $p<0.0001$ ). (E), Frequencies of the first principal ray being epaxial, or longer than other principal rays in both mutants. (F), Cleared and stained skeletal preparations

highlighting the first principal and dorsal procurrent fin rays. The first principal ray (in red) is the first non-bifurcating ray adjacent to a bifurcating ray. Epaxial rays (in purple) vs hypaxial rays (in green) refer to the relation between fin ray bases and the position of the notochord (1 mm scale bar).

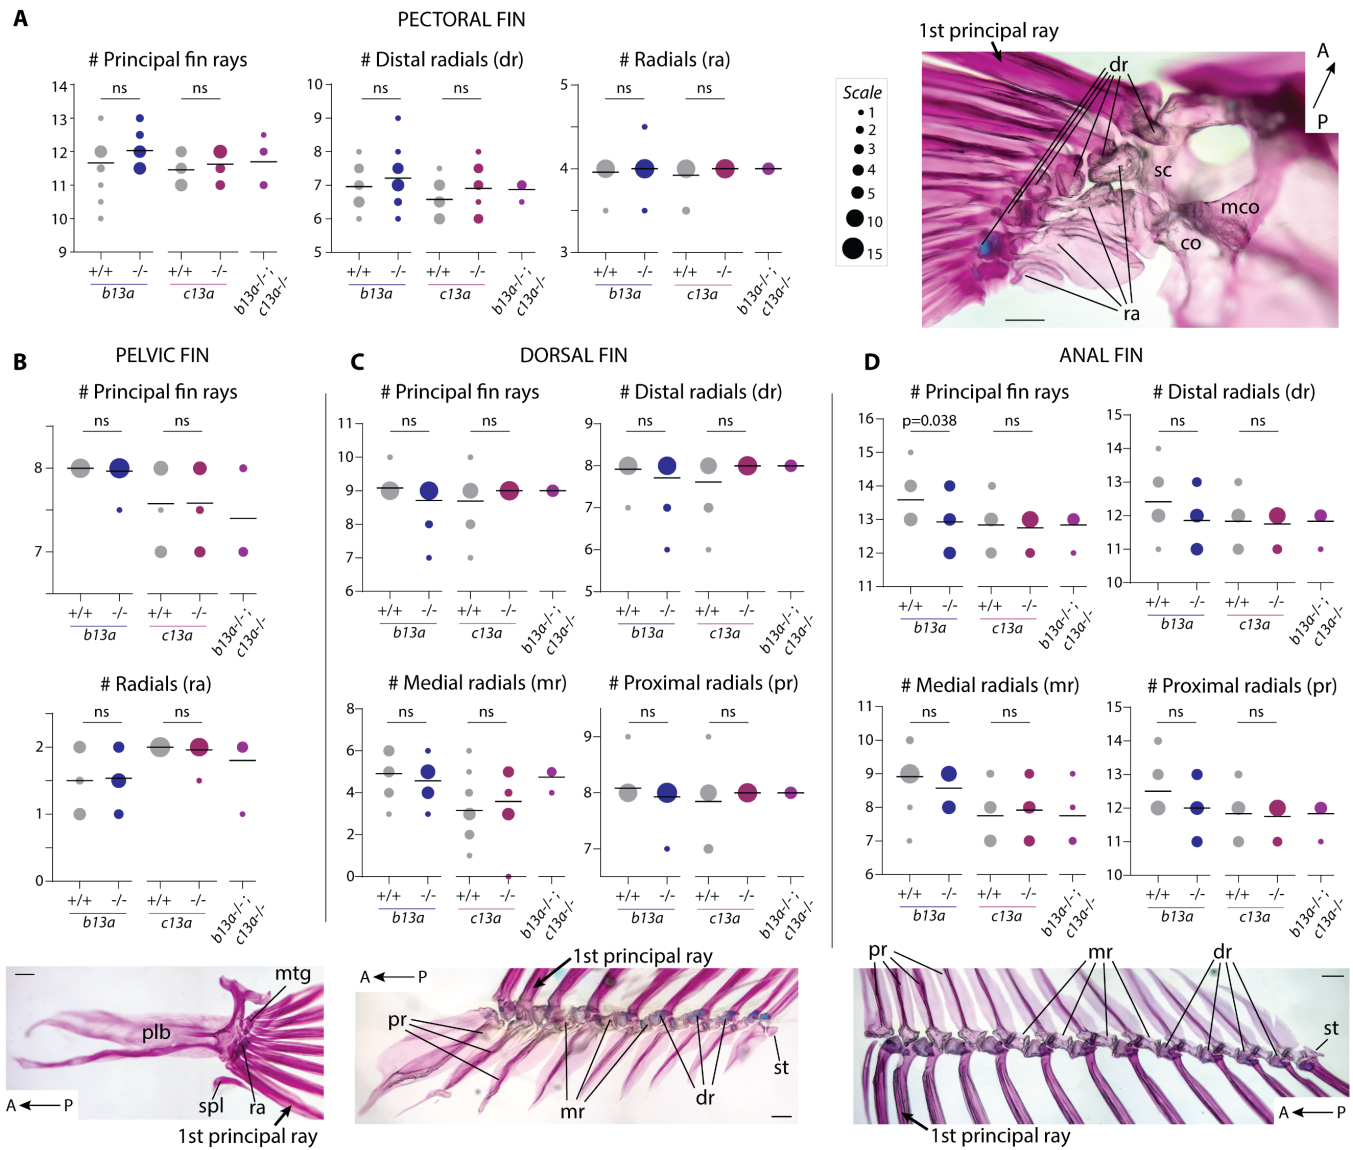

**Fig. S6. Dorsal, anal, pectoral, and pelvic fin ray and radial counts in single and double *b13a*<sup>-/-</sup>; *c13a*<sup>-/-</sup> zebrafish mutants.** The number of principal fin rays and radials for the zebrafish fins, excluding the caudal fin, is shown ( $n = b13a^{+/+}:12, b13a^{+/-}:14, b13a^{-/-}:14, c13a^{+/+}:13, c13a^{+/-}:15$  and  $c13a^{-/-}:12, b13a^{-/-}; c13a^{-/-}:5$ ). For paired fins, the number of left and right rays and radials were added. (A) Pectoral fin: left side endoskeleton shown in a dorsal view. ANOVA revealed no significant count variations in principal fin rays ( $b13a: F_{(1,24)}=1.85, p=0.19; c13a: F_{(1,23)}=0.89, p=0.35$ ), distal radials ( $b13a: F_{(1,24)}=0.96, p=0.34; c13a: F_{(1,22)}=1.85, p=0.19$ ) and radials ( $b13a: F_{(1,24)}=0.37, p=0.55; c13a: F_{(1,22)}=1.85, p=0.19$ ). (B) Pelvic fin: left side shown in a ventral view. ANOVA revealed no significant count variation in principal fin rays ( $b13a: F_{(1,24)}=0.85, p=0.37; c13a: F_{(1,23)}=0.0011, p=0.97$ ) and radials ( $b13a: F_{(1,24)}=0.047, p=0.83; c13a: F_{(1,23)}=1.09, p=0.31$ ). (C) Dorsal fin: lateral view of endoskeleton. ANOVA revealed no significant count variation in principal fin rays ( $b13a: F_{(1,24)}=3.66, p=0.068; c13a: F_{(1,23)}=2.01, p=0.17$ ), distal radials ( $b13a: F_{(1,24)}=1.10, p=0.30; c13a: F_{(1,23)}=4.18, p=0.05$ ), middle radials ( $b13a: F_{(1,24)}=1.01, p=0.33; c13a: F_{(1,23)}=0.59, p=0.45$ ) and proximal radials ( $b13a: F_{(1,24)}=2.01, p=0.17; c13a: F_{(1,23)}=0.92, p=0.35$ ). (D) Anal fin: lateral view of endoskeleton. ANOVA revealed a significant

reduction in principal fin ray counts for *b13a* mutants ( $F_{(1,24)}=4.80$ ,  $p=0.038$ ) but not in *c13a* mutants ( $F_{(1,22)}=0.12$ ,  $p=0.74$ ). No significant variations were found in anal fin distal radials (*b13a*:  $F_{(1,24)}=3.32$ ,  $p=0.081$ ; *c13a*:  $F_{(1,22)}=0.12$ ,  $p=0.74$ ), middle radials (*b13a*:  $F_{(1,24)}=1.78$ ,  $p=0.19$ ; *c13a*:  $F_{(1,22)}=0.28$ ,  $p=0.60$ ) and proximal radials (*b13a*:  $F_{(1,24)}=2.98$ ,  $p=0.097$ ; *c13a*:  $F_{(1,22)}=0.12$ ,  $p=0.74$ ). In all measurements, the mean of double mutant ray number was within the margins of normal variations. Each graph presents the mean, and the circle size is proportional to the number of individuals. “ns” indicates a non-significant ANOVA test. In each image, scale bar is 200  $\mu\text{m}$ , and anteroposterior axis is indicated with an arrow. *Abbrev.*: co, coracoid; dr, distal radial; mco, mesocoracoid; mr, middle radial; mtg, metapterygium; plb, pelvic bone; pr, proximal radial; ra, radial; sc, scapula; spl, splint; st, stay.



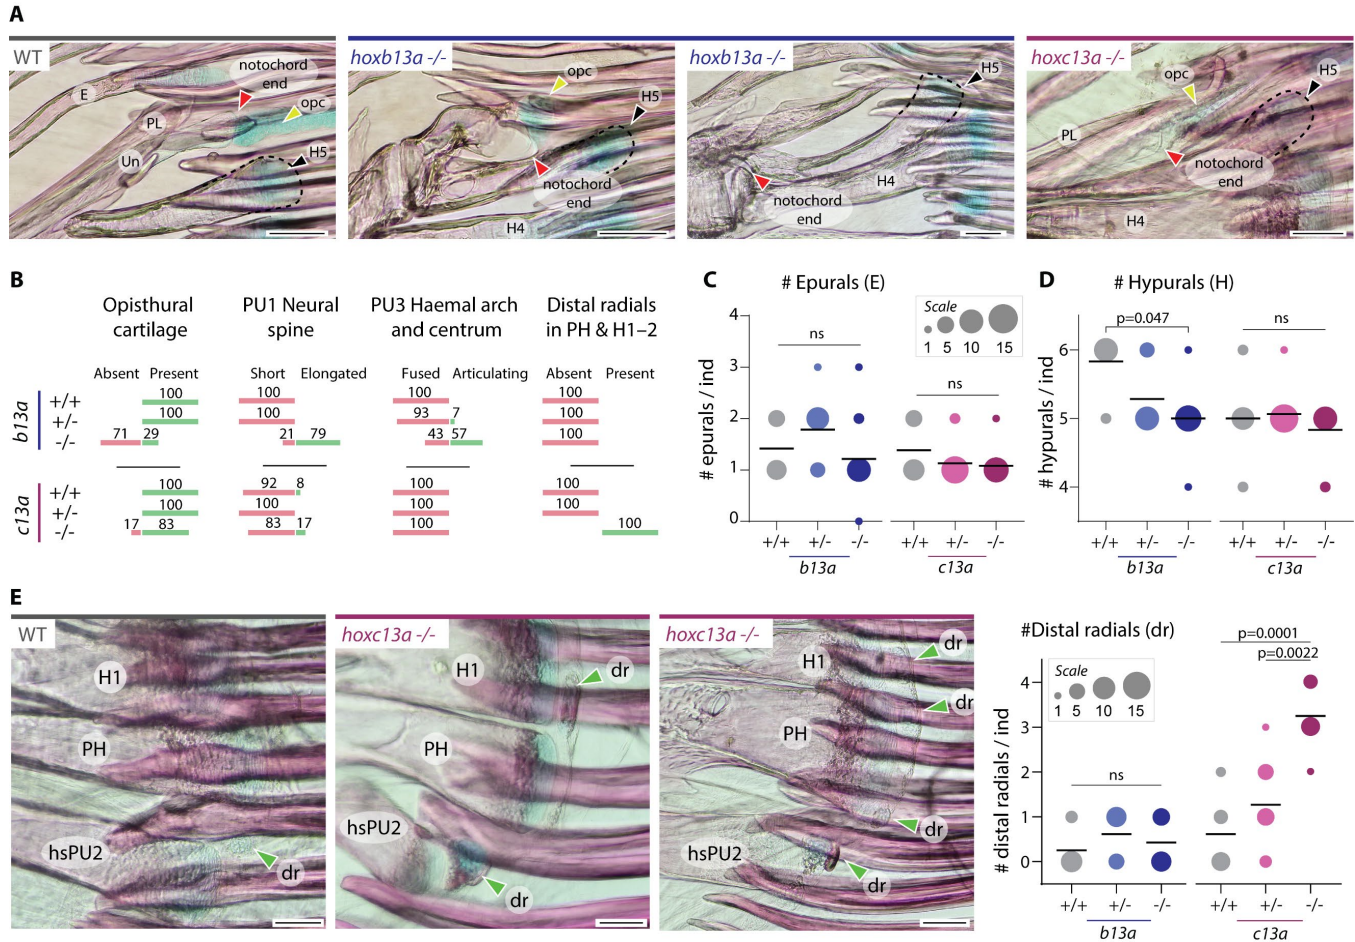

**Fig. S7. Quantification of vertebral phenotypes in *b13a* and *c13a* mutants.** (A), Relationship between the tip of the notochord (red arrowhead), the presence of an opisthural cartilage (yellow arrowhead) and the posterior end of the hypural 5 (dashed line with a black arrowhead). Both mutants exhibit an abbreviated notochord. For b–e,  $n = b13a^{+/+}:12, b13a^{+/-}:14, b13a^{-/-}:14, c13a^{+/+}:13, c13a^{+/-}:15$  and  $c13a^{-/-}:12, b13a^{-/-};c13a^{-/-}:4$ . (B), Frequencies for the presence of an opisthural cartilage, an elongated neural spine on the preural centrum 1, an articulating haemal arch on the preural centrum 3, and extra distal radials in *b13a* and *c13a* mutants. (C), Epural number for both mutants. Poisson regressions revealed no significant changes in epural number in both mutants (*b13a*:  $\chi^2_{(2)}=1.57, p=0.46$ ; *c13a*:  $\chi^2_{(2)}=0.55, p=0.76$ ). (D), Hypural number for both mutants. Poisson regressions revealed a significant decrease in hypural number in *b13a* mutants ( $\chi^2_{(2)}=8.50, p=0.014$ ) but not in *c13a* mutants ( $\chi^2_{(2)}=1.05, p=0.36$ ). Post-hoc comparisons showed a significant effect in *b13a*<sup>-/-</sup> mutants only. (E), Cleared and stained skeletal preparations showing the presence of extra distal radials, either cartilaginous (in blue) or ossified (in red) at the distal ends of hypurals 1 and 2, and the parhypural. Poisson regressions revealed a significant increase in distal radial number in *c13a* mutants ( $\chi^2_{(2)}=27.05, p<0.0001$ ) but not significant in *b13a* mutants ( $\chi^2_{(2)}=1.98, p=0.37$ ). Post-hoc comparisons showed a significant effect in *c13a*<sup>-/-</sup> mutants only. Scale bar is 100  $\mu\text{m}$ . Each graph presents the mean, and the circle size is proportional to the number of individuals.

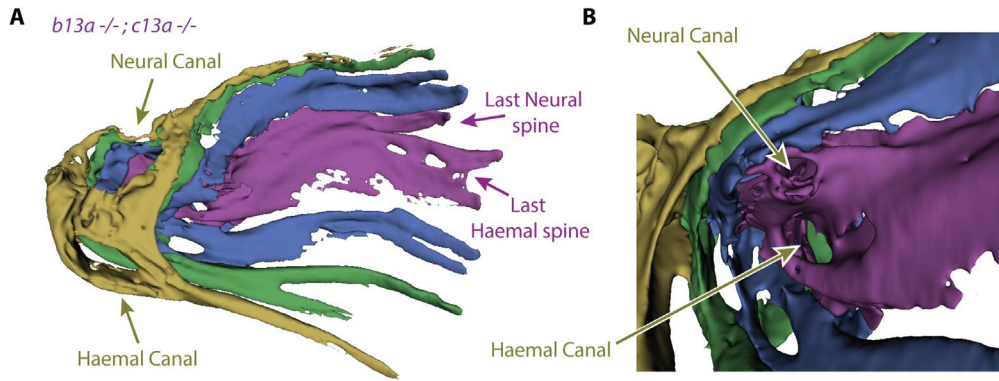

**Fig. S8. Morphological and ontogenetic description of the posterior end of the tail of *b13a*<sup>-/-</sup>; *c13a*<sup>-/-</sup> double mutant fish.** (A), micro-CT segmentation of the last four vertebrae of an adult double mutant, showing extremely condensed and fused posterior elements. The last neural and haemal spines were partially fused together. (B), A close-up on the posterior end of the body axis reveals a neural and haemal canal all the way to the posterior-most element (purple), which implies the absence of hypurals and other ural elements.

**Table S1. Gene IDs for each *hox13* gene present in a broad set of annotated genomes of actinopterygians.** For each species, the family, assembly number, and the NCBI gene ID for each *hox* gene, if present, is given. A dash (–) indicates the absence of the corresponding gene in the respective gene cluster.

| Species                              | Family          | Assembly                                              | <i>a13a</i> | <i>a13b</i> | <i>b13a</i> | <i>b13b</i> | <i>c13a</i> | <i>c13b</i> | <i>d13a</i> | <i>d13b</i> |
|--------------------------------------|-----------------|-------------------------------------------------------|-------------|-------------|-------------|-------------|-------------|-------------|-------------|-------------|
| <i>Acanthopagrus latus</i>           | Sparidae        | fAcaLat1.1<br>(GCF_904848185.1)                       | 119016198   | 119006236   | 119014195   | –           | 119022528   | –           | –           | –           |
| <i>Alosa alosa</i>                   | Clupeidae       | AALO_Geno_1.1<br>(GCF_017589495.1)                    | –           | 125305489   | 125296091   | –           | 125293421   | 125301534   | 125292652   | –           |
| <i>Amphiprion ocellaris</i>          | Pomacentridae   | AmpOce1.0<br>(GCF_002776465.1)                        | 111570269   | 111588836   | 111568215   | –           | 111581487   | –           | –           | –           |
| <i>Anabas testudineus</i>            | Anabantidae     | fAnaTes1.2<br>(GCF_900324465.2)                       | 113153850   | 113170369   | 113160018   | –           | 113167485   | –           | –           | –           |
| <i>Anarrhichthys ocellatus</i>       | Anarrhichadidae | GSC_Weel_1.0<br>(GCF_004355925.1)                     | 116387229   | 116386823   | 116379203   | –           | 116382332   | –           | –           | –           |
| <i>Anguilla anguilla</i>             | Anguillidae     | fAngAng1.pri<br>(GCF_013347855.1)                     | 118233193   | 118210810   | 118216130   | –           | 118208357   | 118211264   | 118224185   | –           |
| <i>Asyanax mexicanus</i>             | Characidae      | AstMex3_surface<br>(GCF_023375975.1)                  | 103021373   | 125802465   | 103043948   | –           | 103031462   | 125787537   | 103046722   | –           |
| <i>Betta splendens</i>               | Osphronemidae   | fBetSpl5.3<br>(GCF_900634795.3)                       | 114865817   | 114843721   | 114860546   | –           | 114858382   | –           | –           | –           |
| <i>Brienomyrus brachyistius</i>      | Mormyridae      | BBRACH_0.4<br>(GCF_023856365.1)                       | 125719156   | 125749217   | –           | 125742441   | 125713053   | 125723646   | 125710344   | –           |
| <i>Chanos chanos</i>                 | Chanidae        | fChaCha1.1<br>(GCF_902362185.1)                       | 115825775   | 115818678   | 115829565   | –           | 115807888   | 115814502   | 115822611   | –           |
| <i>Chelmon rostratus</i>             | Chaetodontidae  | fCheRos1.pri<br>(GCF_017976325.1)                     | 121619703   | 121610632   | 121620985   | –           | 121612905   | –           | –           | –           |
| <i>Clupea harengus</i>               | Clupeidae       | Ch_v2.0.2<br>(GCF_900700415.2)                        | –           | 105911402   | 105912847   | –           | 105912700   | 105907699   | 105907975   | –           |
| <i>Colossoma macropomum</i>          | Serrasalmidae   | Colossoma_macropo<br>mum<br>(GCF_904425465.1)         | 118805088   | 118813412   | 118821189   | –           | 118822780   | 118800031   | 118805755   | –           |
| <i>Cottoperca gobio</i>              | Bovichtidae     | fCotGob3.1<br>(GCF_900634415.1)                       | 115015782   | 115021485   | 115012486   | –           | 115010850   | –           | –           | –           |
| <i>Ctenopharyngodon idella</i>       | Xenocyprididae  | HZGC01<br>(GCF_019924925.1)                           | 127501065   | 127497339   | 127509312   | –           | 127504894   | 127522540   | 127519347   | –           |
| <i>Cynoglossus semilaevis</i>        | Cynoglossidae   | Cse_v1.0<br>(GCF_000523025.1)                         | 103394226   | 103388423   | 103393562   | –           | 103385112   | –           | –           | –           |
| <i>Cyprinodon tularosa</i>           | Cyprinodontidae | ASM1607723v1<br>(GCF_016077235.1)                     | 119779531   | 119772787   | 119778601   | –           | 119785041   | –           | –           | –           |
| <i>Danio rerio</i>                   | Cyprinidae      | GRCz11<br>(GCF_000002035.6)                           | 570239      | 30438       | 559921      | –           | 58059       | 58063       | 30407       | –           |
| <i>Denticiceps clupeioides</i>       | Denticipitidae  | fDenClu1.1<br>(GCF_900700375.1)                       | –           | 114789724   | 114793421   | –           | 114798405   | 114800762   | –           | –           |
| <i>Electrophorus electricus</i>      | Gymnotidae      | fEleEle1.pri<br>(GCF_013358815.1)                     | 113580414   | 113571216   | 113569906   | –           | 113570296   | 113572414   | 113582335   | –           |
| <i>Epinephelus fuscoguttatus</i>     | Serranidae      | E.fuscoguttatus.final<br>_Chr_v1<br>(GCF_011397635.1) | 125904682   | 125893496   | 125879368   | –           | 125891524   | –           | –           | –           |
| <i>Erpetoichthys calabaricus</i>     | Polypteridae    | fErpCal1.3<br>(GCF_900747795.2)                       | 114664210   | –           | 114664381   | –           | 114647630   | –           | 127528919   | –           |
| <i>Esox lucius</i>                   | Esocidae        | fEsoLuc1.pri<br>(GCF_011004845.1)                     | 105023650   | 105018810   | 105013260   | –           | 105013634   | 105016993   | 105016222   | –           |
| <i>Fundulus heteroclitus</i>         | Fundulidae      | MU-UCD_Fhet_4.1<br>(GCF_011125445.2)                  | 105934282   | 105926310   | –           | –           | 105928933   | –           | –           | –           |
| <i>Gadus morhua</i>                  | Gadidae         | gadMor3.0<br>(GCF_902167405.1)                        | 115536261   | 115554199   | 115557907   | –           | 115542510   | –           | –           | –           |
| <i>Gambusia affinis</i>              | Poeciliidae     | SWU_Gaff_1.0<br>(GCF_019740435.1)                     | 122843743   | 122831439   | 122821262   | –           | 122828352   | –           | –           | –           |
| <i>Gasterosteus aculeatus</i>        | Gasterosteidae  | GAculeatus_UGA_v<br>ersion5<br>(GCF_016920845.1)      | 120826906   | 120809982   | 120827242   | –           | 120829913   | –           | –           | –           |
| <i>Girardinichthys multiradiatus</i> | Goodeidae       | DD_fGirMul_XY1<br>(GCF_021462225.1)                   | 124879185   | 124865511   | 124864643   | –           | 124874917   | –           | –           | –           |
| <i>Gouania willdenowi</i>            | Gobiesocidae    | fGouWil2.1<br>(GCF_900634775.1)                       | 114472436   | 114478105   | 114468953   | –           | 114467248   | –           | –           | –           |
| <i>Gymnodraco acuticeps</i>          | Bathdraconidae  | fGymAcu1.1<br>(GCF_902827175.1)                       | 117563002   | 117554052   | 117547479   | –           | 117541974   | –           | –           | –           |
| <i>Haplochromis burtoni</i>          | Cichlidae       | NCSU_Asbu1<br>(GCF_018398535.1)                       | 102313663   | 102305000   | 102307949   | –           | 102309054   | –           | –           | –           |
| <i>Hippocampus zosterae</i>          | Syngnathidae    | ASM2543408v3<br>(GCF_025434085.1)                     | 127603790   | 127601411   | 127590245   | –           | 127596034   | –           | –           | –           |
| <i>Hypomesus transpacificus</i>      | Osmeridae       | fHypTra1<br>(GCF_021917145.1)                         | 124467241   | 124479323   | 124479662   | –           | 124481039   | 124471218   | 124484894   | –           |

|                                      |                  | IpCoco_1.2                              |           |           |           |           |           |           |           |   |
|--------------------------------------|------------------|-----------------------------------------|-----------|-----------|-----------|-----------|-----------|-----------|-----------|---|
| <i>Ictalurus punctatus</i>           | Ictaluridae      | (GCF_001660625.2)<br>IGBB_LRoh.1.0      | 108257341 | 100528527 | 108275712 | -         | 124481039 | 108281070 | 108266222 | - |
| <i>Labeo rohita</i>                  | Cyprinidae       | (GCF_022985175.1)                       | 127182171 | 127178305 | 127163141 | -         | 127154533 | 127173481 | 127170654 | - |
| <i>Larimichthys crocea</i>           | Sciaenidae       | L_crocea_2.0<br>(GCF_000972845.2)       | 104940566 | 104927762 | 104927154 | -         | 113747701 | -         | -         | - |
| <i>Lates carcarifer</i>              | Latidae          | TLL_Latcal_v3<br>(GCF_001640805.2)      | 108877307 | 108891462 | 108898525 | -         | 108876406 | -         | -         | - |
| <i>Lepisosteus oculatus</i>          | Lepisosteidae    | LepOcu1<br>(GCF_000242695.1)            | 102685955 | -         | 102684356 | -         | 102695065 | -         | 102687373 | - |
| <i>Mastacembelus armatus</i>         | Mastacembelidae  | fMasArm1.2<br>(GCF_900324485.2)         | 113126226 | 113122525 | 113141170 | -         | 113145809 | -         | -         | - |
| <i>Megalops cyprinoides</i>          | Megalopidae      | fMegCyp1.pri<br>(GCF_013368585.1)       | 118796574 | 118784978 | 118794944 | 118786861 | 118781054 | 118779675 | 118788744 | - |
| <i>Melanotaenia boesemani</i>        | Melanotaeniidae  | fMelBoe1.pri<br>(GCF_017639745.1)       | 121657123 | 121641975 | 121630574 | -         | 121651751 | -         | -         | - |
| <i>Micropterus dolomieu</i>          | Centrarchidae    | ASM2129224v1<br>(GCF_021292245.1)       | 123976630 | 123968447 | 123963320 | -         | 123974690 | -         | -         | - |
| <i>Monopterus albus</i>              | Synbranchidae    | M_albus_1.0<br>(GCF_001952655.1)        | 109968138 | 109967340 | 109964752 | -         | 109971443 | -         | -         | - |
| <i>Morone saxatilis</i>              | Moronidae        | NCSU_SB_2.0<br>(GCF_004916995.1)        | 118342900 | 118336211 | 118322950 | -         | 118324617 | -         | -         | - |
| <i>Mugil cephalus</i>                | Mugilidae        | CIBA_Mcephalus_1.1<br>(GCF_022458985.1) | 125020101 | 125016446 | 124997272 | -         | 125004882 | -         | -         | - |
| <i>Myripristis murdjan</i>           | Holocentridae    | fMyrMur1.1<br>(GCF_902150065.1)         | 115367737 | 115373564 | 115363531 | -         | 115362656 | -         | -         | - |
| <i>Nothobranchius furzeri</i>        | Nothobranchiidae | Nfu_20140520<br>(GCF_001465895.1)       | 107383371 | 107373760 | 107372950 | -         | 107390910 | -         | -         | - |
| <i>Notolabrus celidotus</i>          | Labridae         | fNotCel1.pri<br>(GCF_009762535.1)       | 117827578 | 117822401 | 117831858 | -         | 117821136 | -         | -         | - |
| <i>Notothenia coriiceps</i>          | Nototheniidae    | NC01<br>(GCF_000735185.1)               | 104941128 | 104949896 | 104961652 | -         | 104956898 | -         | -         | - |
| <i>Oryzias latipes</i>               | Adrianichthyidae | ASM223467v1<br>(GCF_002234675.1)        | 101162380 | 101158301 | 101175240 | -         | 101172814 | -         | -         | - |
| <i>Pangasianodon hypophthalmus</i>   | Pangasiidae      | fPanHyp1.pri<br>(GCF_027335858.1)       | 113536158 | 113542465 | 113527999 | -         | 113530408 | 113537872 | 113526107 | - |
| <i>Parambassis ranga</i>             | Ambassidae       | fParRan2.1<br>(GCF_900634625.1)         | 114450846 | 114448736 | 114440004 | -         | 114438672 | -         | -         | - |
| <i>Paramormyrops kingsleyae</i>      | Mormyridae       | PKINGS_0.1<br>(GCF_002872115.1)         | 111846880 | 111839073 | -         | 111845174 | 111837113 | 111854629 | 111838605 | - |
| <i>Perca fluviatilis</i>             | Percidae         | GENO_Pfluv_1.0<br>(GCF_010015445.1)     | 120570779 | 120562706 | 120573967 | -         | 120558388 | -         | -         | - |
| <i>Periophthalmus magnuspinnatus</i> | Gobiidae         | fPerMag1.pri<br>(GCF_009829125.1)       | 117378578 | 117384231 | 117374905 | -         | 117373699 | -         | -         | - |
| <i>Pimephales promelas</i>           | Leuciscidae      | EPA_FHM_2.0<br>(GCF_016745375.1)        | 120483476 | 120494977 | 120489151 | -         | 120462838 | 120473470 | 120459864 | - |
| <i>Polyodon spathula</i>             | Polyodontidae    | ASM1765450v1<br>(GCF_017654505.1)       | 121315113 | -         | 121324053 | -         | 121307103 | -         | 121323563 | - |
| <i>Polypterus senegalus</i>          | Polypteridae     | ASM1683550v1<br>(GCF_016835505.1)       | 120515966 | -         | 120517882 | -         | 120526741 | -         | 120531872 | - |
| <i>Pseudochaenichthys georgianus</i> | Channichthyidae  | fPseGeo1.1<br>(GCF_902827115.1)         | 117455526 | 117461369 | 117451460 | -         | 117449376 | -         | -         | - |
| <i>Puntigrus tetrazona</i>           | Cyprinidae       | ASM1883169v1<br>(GCF_018831695.1)       | 122323997 | 122360656 | 122341821 | -         | 122329075 | 122354330 | 122351297 | - |
| <i>Pygocentrus nattereri</i>         | Serrasalminidae  | fPygNat1.pri<br>(GCF_015220715.1)       | 108425156 | 108441525 | 108412326 | -         | 108433367 | 108424576 | 108424277 | - |
| <i>Salarias fasciatus</i>            | Blenniidae       | fSalaFa1.1<br>(GCF_902148845.1)         | 115380987 | 115396613 | 115387337 | -         | 115408331 | -         | -         | - |
| <i>Salmo trutta A</i>                | Salmonidae       | fSalTru1.1<br>(GCF_901001165.1)         | 115175456 | 115187781 | 115197040 | -         | 115167868 | 115150489 | 115155476 | - |
| <i>Salmo trutta B</i>                | Salmonidae       | fSalTru1.1<br>(GCF_901001165.1)         | 115173940 | 115187701 | 115171015 | -         | 115165528 | 115207926 | 115160778 | - |
| <i>Scatophagus argus</i>             | Scatophagidae    | fScaArg1.pri<br>(GCF_020382885.2)       | 124074176 | 124064917 | 124073304 | -         | 124063977 | -         | -         | - |
| <i>Scleropages formosus</i>          | Osteoglossidae   | fSclFor1.1<br>(GCF_900964775.1)         | 108933365 | 108927390 | 108936910 | 108918676 | 108939194 | 108918377 | -         | - |
| <i>Scophthalmus maximus</i>          | Scophthalmidae   | ASM2237912v1<br>(GCF_022379125.1)       | 118292521 | 118302692 | 118288805 | -         | 118316278 | -         | -         | - |
| <i>Sebastes umbrosus</i>             | Sebastidae       | fSebUmb1.pri<br>(GCF_015220745.1)       | 119503423 | 119496298 | 119501162 | -         | 119489931 | -         | -         | - |
| <i>Seriola dumerili</i>              | Carangidae       | Sdu_1.0<br>(GCF_002260705.1)            | 111223387 | 111238797 | 111669768 | -         | 111219155 | -         | -         | - |
| <i>Silurus meridionalis</i>          | Siluridae        | ASM1480568v1<br>(GCF_014805685.1)       | 124376121 | 124384259 | 124396948 | -         | 124399096 | 124402352 | 124382995 | - |
| <i>Syngnathus acus</i>               | Syngnathidae     | fSynAcu1.2<br>(GCF_901709675.1)         | 119130672 | 119136231 | 119126029 | -         | 119119446 | -         | -         | - |

|                                 |                |                                                 |           |           |           |   |           |           |           |   |
|---------------------------------|----------------|-------------------------------------------------|-----------|-----------|-----------|---|-----------|-----------|-----------|---|
| <i>Tachysurus fulvidraco</i>    | Bagridae       | HZAU_PFX 2.0<br>(GCF_022655615.1)<br>fTakRub1.2 | 113641606 | 113644199 | 113637995 | - | 113641954 | 113661989 | 113654529 | - |
| <i>Takifugu rubripes</i>        | Tetraodontidae | (GCF_901000725.2)<br>fThaAma1.1                 | 101069611 | 101062469 | 101072102 | - | 101079732 | -         | -         | - |
| <i>Thalassophryne amazonica</i> | Batrachoididae | (GCF_902500255.1)<br>fThuAlb1.1                 | 117501877 | 117514506 | 117527962 | - | 117511652 | -         | -         | - |
| <i>Thunnus albacares</i>        | Scombridae     | (GCF_914725855.1)<br>fToxJac2.pri               | 122969662 | 122987517 | 122967155 | - | 122982087 | -         | -         | - |
| <i>Toxotes jaculatrix</i>       | Toxotidae      | (GCF_017976425.1)<br>fTreBer1.1                 | 121192022 | 121186135 | 121198671 | - | 121194472 | -         | -         | - |
| <i>Trematomus bernacchii</i>    | Nototheniidae  | (GCF_902827165.1)<br>ASM1685928v1               | 117477647 | 117480696 | 117469296 | - | 117494396 | -         | -         | - |
| <i>Xiphias gladius</i>          | Xiphiidae      | (GCF_016859285.1)                               | 120786631 | 120784448 | 120787991 | - | 120803580 | -         | -         | - |

**Table S2. Character-taxon data matrix for the seven characters used in the character reconstruction analysis.** State [-] represents the character is not applicable. Missing or ambiguous information is represented with [?]; †, extinct taxon.

| Taxon                              | Characters |     |   |   |   |     |   |
|------------------------------------|------------|-----|---|---|---|-----|---|
|                                    | 1          | 2   | 3 | 4 | 5 | 6   | 7 |
| <i>Amia calva</i>                  | 0          | 0   | 0 | 0 | 0 | 0   | 0 |
| † <i>Amia pattersoni</i>           | 0          | 0   | 0 | 0 | 0 | -   | 0 |
| † <i>Anaethalion</i>               | 1          | 1   | 1 | 1 | 1 | 2   | 1 |
| † <i>Ascalabos</i>                 | 1          | 1   | 1 | 1 | 1 | 2   | 1 |
| † <i>Aspidorhynchus</i>            | 1          | 0   | 1 | 0 | 1 | 1   | 0 |
| † <i>Belonostomus</i>              | 1          | 0   | 1 | 0 | 1 | 0   | 0 |
| † <i>Domeykos</i>                  | 1          | 1   | 1 | 1 | 1 | 1   | 1 |
| † <i>Dorsetichthys</i>             | 1          | 0   | 1 | 0 | 1 | 1   | 1 |
| † <i>Ebertichthys</i>              | 1          | 1   | - | 1 | 1 | 2   | 1 |
| <i>Elops</i>                       | 1          | 1   | 1 | 0 | 1 | 2   | 1 |
| † <i>Eurycormus</i>                | 1          | 0   | 1 | 0 | 1 | 1   | 1 |
| <i>Heterotis</i>                   | 1          | -   | 0 | 1 | 0 | 0   | 1 |
| <i>Hiodon</i>                      | 1          | 1   | 1 | 1 | 0 | 1/2 | 1 |
| † <i>Hypsocormus</i>               | 0          | -   | 0 | 0 | 0 | 3   | - |
| † <i>Leptolepis coryphaenoides</i> | 1          | 1   | 1 | 1 | 1 | 2   | 0 |
| <i>Lepisosteus</i>                 | 0          | 0   | 0 | 0 | 0 | 0   | 0 |
| † <i>Luisichthys</i>               | ?          | 1   | 1 | 0 | 1 | -   | 1 |
| † <i>Lycoptera</i>                 | 1          | 0/1 | 1 | 1 | 0 | 0   | 1 |
| <i>Megalops</i>                    | 1          | 1   | 1 | 1 | 1 | 2   | 1 |
| † <i>Obaichthys</i>                | 0          | 0   | 0 | 0 | - | 0   | 0 |
| † <i>Orthocormus</i>               | 0          | -   | 0 | 0 | 0 | 3   | - |
| † <i>Pachycormus</i>               | 0          | -   | 0 | 0 | 0 | 3   | - |
| † <i>Parapholidophorus</i>         | ?          | 0   | 0 | 0 | - | 1   | 0 |

|                                 |     |   |   |   |   |     |   |
|---------------------------------|-----|---|---|---|---|-----|---|
| † <i>Pholidoctenus serianus</i> | 1   | 0 | 0 | 0 | 1 | 0/3 | 0 |
| † <i>Prohalecites</i>           | 1   | 0 | 0 | 0 | 1 | 0   | 0 |
| † <i>Protoclupea</i>            | 1   | 1 | 1 | 0 | 1 | 1   | 1 |
| † <i>Tharsis</i>                | 0/1 | 1 | 1 | 0 | 1 | 2   | 0 |
| † <i>Varasichthys</i>           | ?   | 1 | 1 | 0 | 0 | ?   | 1 |
| † <i>Vinctifer</i>              | 1   | – | 1 | 0 | 1 | 0   | 0 |



**Table S3. Oligonucleotides for each of the experiments performed in this work.** Oligonucleotides for *in situ* hybridization, single guide RNAs for CRISPR/Cas9 and genotyping primers for the heteroduplex mobility assay are detailed.

| Identifier                                               | Oligonucleotide                                                                           |
|----------------------------------------------------------|-------------------------------------------------------------------------------------------|
| <i>hoxa13a</i> ISH probes                                | F: 5' AGGTAACTTCTCGCCAAGCC 3'<br>R: 5' ATCCGTCTGCGTTTGTCCCTT 3'                           |
| <i>hoxb13a</i> ISH probes                                | F: 5' GTTTGGTTGGAAGCGGCAAT 3'<br>R: 5' GCTATGGCGCGGTGTTTTTA 3'                            |
| <i>hoxc13a</i> ISH probes:                               | F 5' GGCCTGCATCCACGCTGG 3'<br>R 5' CTGAGAGGTTGGTTGTCGCA 3'                                |
| <i>hoxc13b</i> ISH probes                                | F: 5' CTGGGCGGACACACTGATTT 3'<br>R: 5' CTCGGAGAGACTCGTTGTGG 3'                            |
| <i>hoxc12a</i> ISH probes                                | F: 5' AATCCATCGGAGTCGTGCAA 3'<br>R: 5' GGACAAAGCCTGTTCCCTCA 3'                            |
| sgRNA <i>hoxb13a_1</i>                                   | 5'_TAATACGACTCACTATAGGGCGTAGGGGATGGGACCTGGTTTT<br>AGAGCTAGAA 3'                           |
| sgRNA <i>hoxb13a_2</i>                                   | 5'_TAATACGACTCACTATAGGGCCATGGACAAGGCTAGAGTTTT<br>AGAGCTAGAA 3'                            |
| sgRNA <i>hoxc13a_1</i>                                   | 5'_TAATACGACTCACTATAGGGCAGCGCTTTGCCACAGGTTTT<br>AGAGCTAGAA 3'                             |
| sgRNA <i>hoxc13a_2</i>                                   | 5'_TAATACGACTCACTATAGGAGCGCTAGATGACGTCTGGTTTT<br>AGAGCTAGAA 3'                            |
| sgRNA 3' common primer:                                  | 5'_AAAAGCACCGACTCGGTGCCACTTTTTCAAGTTGATAACGG<br>ACTAGCCTTATTTAACTTGCTATTTCTAGCTCTAAAAC 3' |
| Heteroduplex mobility shift assay against <i>hoxb13a</i> | F: 5'_GGAATCTGATGGCCCACTCG_3'<br>R: 5'_TCAGACGTGACCGGGGTATC 3'                            |
| Heteroduplex mobility shift assay against <i>hoxc13a</i> | F: 5'_GCAGCCCGTGATATGACG_3'<br>R: 5'_CTGCAAGTTCACATTGTGCG_3'                              |

**Movie S1. Double mutant adult and larvae swimming.** The movie shows the swimming behavior of double mutant adults alongside wild type fish to highlight the differences in caudal fin morphology. Notably, the fish in the video swim using their anal fin. Additionally, the movie includes footage of a juvenile fish during the tail coiling stage, showcasing their unique swimming behavior.

**Movie S2. Micro-CT video of double *b13a*<sup>-/-</sup>; *c13a*<sup>-/-</sup> mutant.** Each vertebra is segmented in a different color.

## REFERENCES AND NOTES

1. J. J. Heckel, Über das Wirbelsäulen-Ende bei Ganoiden und Teleostiern. *Sber. Akad. Wiss. Wien* **5**, 143–147 (1850).
2. A. Kölliker, *Über das Ende der Wirbelsäule der Ganoiden und einiger Teleostier*. (von Willhelm Engelmann, 1860).
3. J. A. Ryder, "On the origin of heterocercy and the evolution of the fins and fin rays of fishes," *Rep. US Comm. Fish and Fisheries*. (US Government Printing Office, 1884), pp. 981–1107.
4. H.-P. Schultze, G. Arratia, The composition of the caudal skeleton of teleosts (Actinopterygii: Osteichthyes). *Zool. J. Linn. Soc.* **97**, 189–231 (1989).
5. O. Nybelin, Zur Morphologie und Terminologie des Schwanzskelettes der Actinopterygier. *Ark. Zool.* **15**, 485–516 (1963).
6. B. D. Metscher, P. E. Ahlberg, "Origin of the teleost tail: Phylogenetic frameworks for developmental studies" in *Major Events in Early Vertebrate Evolution*, P. E. Ahlberg, Ed. (Taylor & Francis, 2001), chap. 19, pp. 333–349.
7. H.-P. Schultze, G. Arratia, "The caudal skeleton of basal teleosts, its conventions, and some of its major evolutionary novelties in a temporal dimension" in *Mesozoic Fishes 5 – Global Diversity and Evolution*, G. Arratia, H.-P. Schultze, M. V. H. Wilson, Eds. (Verlag Dr. Friedrich Pfeil, 2013), pp. 187–246.
8. G. Arratia, Complexities of early Teleostei and the evolution of particular morphological structures through time. *Copeia* **103**, 999–1025 (2015).
9. T. H. Huxley, Original communications: Observations on the development of some parts of the skeleton of fishes. *J. Cell Sci.* **1**, 33–46 (1859).
10. T. Desvignes, A. Carey, J. H. Postlethwait, Evolution of caudal fin ray development and caudal fin hypural diastema complex in spotted gar, teleosts, and other neopterygian fishes. *Dev. Dyn.* **247**, 832–853 (2018).

11. T. Desvignes, A. E. Robbins, A. Z. Carey, R. Bailon-Zambrano, J. T. Nichols, J. H. Postlethwait, K. Stankunas, Coordinated patterning of zebrafish caudal fin symmetry by a central and two peripheral organizers. *Dev. Dyn.* **251**, 1306–1321 (2022).
12. Y. Nakatani, P. Shingate, V. Ravi, N. E. Pillai, A. Prasad, A. McLysaght, B. Venkatesh, Reconstruction of proto-vertebrate, proto-cyclostome and proto-gnathostome genomes provides new insights into early vertebrate evolution. *Nat. Commun.* **12**, 4489 (2021).
13. O. Simakov, F. Marletaz, J. X. Yue, B. O'Connell, J. Jenkins, A. Brandt, R. Calef, C. H. Tung, T. K. Huang, J. Schmutz, N. Satoh, J. K. Yu, N. H. Putnam, R. E. Green, D. S. Rokhsar, Deeply conserved synteny resolves early events in vertebrate evolution. *Nat. Ecol. Evol.* **4**, 820–830 (2020).
14. E. B. Lewis, A gene complex controlling segmentation in *Drosophila*. *Nature* **276**, 565–570 (1978).
15. D. Duboule, P. Dollé, The structural and functional organization of the murine HOX gene family resembles that of *Drosophila* homeotic genes. *EMBO J.* **8**, 1497–1505 (1989).
16. S. J. Gaunt, R. Krumlauf, D. Duboule, Mouse homeo-genes within a subfamily, Hox-1.4, –2.6 and –5.1, display similar anteroposterior domains of expression in the embryo, but show stage- and tissue-dependent differences in their regulation. *Development* **107**, 131–141 (1989).
17. A. Graham, N. Papalopulu, R. Krumlauf, The murine and *Drosophila* homeobox gene complexes have common features of organization and expression. *Cell* **57**, 367–378 (1989).
18. N. Denans, T. Iimura, O. Pourquié, *Hox* genes control vertebrate body elongation by collinear Wnt repression. *eLife* **4**, e04379 (2015).
19. R. Aires, L. de Lemos, A. Novoa, A. D. Jurberg, B. Mascrez, D. Duboule, M. Mallo, Tail Bud progenitor activity relies on a network comprising *Gdf11*, *Lin28*, and *Hox13* genes. *Dev. Cell* **48**, 383–395.e8 (2019).

20. T. Young, J. E. Rowland, C. van de Ven, M. Bialecka, A. Novoa, M. Carapuco, J. van Nes, W. de Graaff, I. Duluc, J. N. Freund, F. Beck, M. Mallo, J. Deschamps, *Cdx* and *Hox* genes differentially regulate posterior axial growth in mammalian embryos. *Dev. Cell* **17**, 516–526 (2009).
21. K. D. Economides, L. Zeltser, M. R. Capecchi, *Hoxb13* mutations cause overgrowth of caudal spinal cord and tail vertebrae. *Dev. Biol.* **256**, 317–330 (2003).
22. A. R. Godwin, M. R. Capecchi, *Hoxc13* mutant mice lack external hair. *Genes Dev.* **12**, 11–20 (1998).
23. A. Amores, A. Force, Y L Yan, L. Joly, C. Amemiya, A. Fritz, R K Ho, J. Langeland, V. Prince, Y L Wang, M. Westerfield, M. Ekker, J. H. Postlethwait, Zebrafish hox Clusters and vertebrate genome evolution. *Science* **282**, 1711–1714 (1998).
24. D. Davesne, M. Friedman, A. D. Schmitt, V. Fernandez, G. Carnevale, P. E. Ahlberg, S. Sanchez, R. B. J. Benson, Fossilized cell structures identify an ancient origin for the teleost whole-genome duplication. *Proc. Natl. Acad. Sci. U.S.A.* **118**, e2101780118 (2021).
25. J. S. Taylor, I. Braasch, T. Frickey, A. Meyer, Y. Van de Peer, Genome duplication, a trait shared by 22000 species of ray-finned fish. *Genome Res.* **13**, 382–390 (2003).
26. R. Thummel, L. Li, C. Tanase, M. P. Sarras, Jr., A. R. Godwin, Differences in expression pattern and function between zebrafish *hoxc13* orthologs: Recruitment of *Hoxc13b* into an early embryonic role. *Dev. Biol.* **274**, 318–333 (2004).
27. M. Corredor-Adámez, M. Welten, H. Spaink, J. Jeffery, R. Schoon, M. De Bakker, C. Bagowski, A. Meijer, F. Verbeek, M. Richardson, Genomic annotation and transcriptome analysis of the zebrafish (*Danio rerio*) hoxcomplex with description of a novel member, *hoxb13a*. *Evol. Dev.* **7**, 362–375 (2005).
28. Z. Ye, D. Kimelman, *Hox13* genes are required for mesoderm formation and axis elongation during early zebrafish development. *Development* **147**, dev185298 (2020).

29. J. Géraudie, V. Borday Birraux, Posterior *hoxa* genes expression during zebrafish bony fin ray development and regeneration suggests their involvement in scleroblast differentiation. *Dev. Genes Evol.* **213**, 182–186 (2003).
30. R. Thummel, M. Ju, M. P. Sarras, Jr., A. R. Godwin, Both *Hoxc13* orthologs are functionally important for zebrafish tail fin regeneration. *Dev. Genes Evol.* **217**, 413–420 (2007).
31. C. Fromental-Ramain, X. Warot, N. Messadecq, M. LeMeur, P. Dollé, P. Chambon, *Hoxa-13* and *Hoxd-13* play a crucial role in the patterning of the limb autopod. *Development* **122**, 2997–3011 (1996).
32. D. Ahn, R. K. Ho, Tri-phasic expression of posterior *Hox* genes during development of pectoral fins in zebrafish: Implications for the evolution of vertebrate paired appendages. *Dev. Biol.* **322**, 220–233 (2008).
33. R. Freitas, C. Gomez-Marin, J. M. Wilson, F. Casares, J. L. Gomez-Skarmeta, *Hoxd13* contribution to the evolution of vertebrate appendages. *Dev. Cell* **23**, 1219–1229 (2012).
34. T. Nakamura, A. R. Gehrke, J. Lemberg, J. Szymaszek, N. H. Shubin, Digits and fin rays share common developmental histories. *Nature* **537**, 225–228 (2016).
35. D. M. Parichy, M. R. Elizondo, M. G. Mills, T. N. Gordon, R. E. Engeszer, Normal table of postembryonic zebrafish development: Staging by externally visible anatomy of the living fish. *Dev. Dyn.* **238**, 2975–3015 (2009).
36. G. Arratia, Actinopterygian postcranial skeleton with special reference to the diversity of fin ray elements, and the problem of identifying homologies in *Mesozoic Fishes 4 – Homology and Phylogeny*, G. Arratia, H.-P. Schultze, M. V. H. Wilson, Eds. (Verlag Dr. Friedrich Pfeil, 2008), pp. 49–101.
37. N. C. Bird, P. M. Mabee, Developmental morphology of the axial skeleton of the zebrafish, *Danio rerio* (Ostariophysi: Cyprinidae). *Dev. Dyn.* **228**, 337–357 (2003).

38. H. Kryvi, K. Nordvik, P. G. Fjellidal, M. Eilertsen, J. V. Helvik, E. N. Storen, J. H. Long, Jr., Heads and tails: The notochord develops differently in the cranium and caudal fin of Atlantic Salmon (*Salmo salar*, L.). *Anat. Rec.* **304**, 1629–1649 (2021).
39. L. Lleras Forero, R. Narayanan, L. F. Huitema, M. VanBergen, A. Apschner, J. Peterson-Maduro, I. Logister, G. Valentin, L. G. Morelli, A. C. Oates, S. Schulte-Merker, Segmentation of the zebrafish axial skeleton relies on notochord sheath cells and not on the segmentation clock. *eLife* **7**, e33843 (2018).
40. N. Cumplido, M. L. Allende, G. Arratia, From Devo to Evo: Patterning, fusion and evolution of the zebrafish terminal vertebra. *Front. Zool.* **17**, 18 (2020).
41. D. Duboule, G. Morata, Colinearity and functional hierarchy among genes of the homeotic complexes. *Trends Genet.* **10**, 358–364 (1994).
42. C. Patterson, The caudal skeleton in lower Liassic pholidophorid fishes. *Bull.Br.Mus.Nat.Hist.Geol.* **16**, 201–239 (1968).
43. G. Arratia, "The caudal skeleton of Jurassic teleosts; a phylogenetic analysis" in *Early vertebrates and related problems in evolutionary biology*, M. Chang, H. Liu, G.-R. Zhang, Eds. (Science Press, 1991), pp. 249–340.
44. G. Arratia, New Triassic teleosts (Actinopterygii, Teleostomorpha) from northern Italy and their phylogenetic relationships among the most basal teleosts. *J. Vertebr. Paleontol.* **37**, e1312690 (2017).
45. G. Arratia, Morphology, taxonomy, and phylogeny of Triassic pholidophorid fishes (Actinopterygii, Teleostei). *J. Vertebr. Paleontol.* **33**, 1–138 (2013).
46. G. Arratia, H. P. Schultze, H. Tischlinger, On a remarkable new species of *Tharsis*, a Late Jurassic teleostean fish from southern Germany: Its morphology and phylogenetic relationships. *Foss. Rec.* **22**, 1–23 (2019).



47. W. McGinnis, R. L. Garber, J. Wirz, A. Kuroiwa, W. J. Gehring, A homologous protein-coding sequence in *Drosophila* homeotic genes and its conservation in other metazoans. *Cell* **37**, 403–408 (1984).
48. E. B. Lewis, The bithorax complex: The first fifty years. *Int. J. Dev. Biol.* **42**, 403–415 (1998).
49. J. H. Postlethwait, H. A. Schneiderman, A clonal analysis of determination in *Antennapedia* a homoeotic mutant of *Drosophila melanogaster*. *Proc. Natl. Acad. Sci. U. S. A.* **64**, 176–183 (1969).
50. J. H. Postlethwait, H. A. Schneiderman, Pattern formation and determination in the antenna of the homoeotic mutant *Antennapedia* of *Drosophila melanogaster*. *Dev. Biol.* **25**, 606–640 (1971).
51. T. Sato, K. Kataoka, Y. Ito, S. Yokoyama, M. Inui, M. Mori, S. Takahashi, K. Akita, S. Takada, H. Ueno-Kudoh, H. Asahara, *Lin28a/let-7* pathway modulates the *Hox* code via *Polycomb* regulation during axial patterning in vertebrates. *eLife* **9**, e53608 (2020).
52. L. Thomson, L. Muresan, B. Steventon, The zebrafish presomitic mesoderm elongates through compaction-extension. *Cells Dev.* **168**, 203748 (2021).
53. A. Mongera, P. Rowghanian, H. J. Gustafson, E. Shelton, D. A. Kealhofer, E. K. Carn, F. Serwane, A. A. Lucio, J. Giammona, O. Campàs, A fluid-to-solid jamming transition underlies vertebrate body axis elongation. *Nature* **561**, 401–405 (2018).
54. L. Zhang, C. Kendrick, D. Julich, S. A. Holley, Cell cycle progression is required for zebrafish somite morphogenesis but not segmentation clock function. *Development* **135**, 2065–2070 (2008).
55. C. M. Bouldin, C. D. Snelson, G. H. Farr, D. Kimelman, Restricted expression of *cdc25a* in the tailbud is essential for formation of the zebrafish posterior body. *Genes Dev.* **28**, 384–395 (2014).

56. B. Steventon, F. Duarte, R. Lagadec, S. Mazan, J. F. Nicolas, E. Hirsinger, Species-specific contribution of volumetric growth and tissue convergence to posterior body elongation in vertebrates. *Development* **143**, 1732–1741 (2016).
57. R. T. Lee, J. P. Thiery, T. J. Carney, Dermal fin rays and scales derive from mesoderm, not neural crest. *Curr. Biol.* **23**, R336–R337 (2013).
58. C. Neutens, D. Adriaens, J. Christiaens, B. De Kegel, M. Dierick, R. Boistel, L. Van Hoorebeke, Grasping convergent evolution in syngnathids: A unique tale of tails. *J. Anat.* **224**, 710–723 (2014).
59. O. Larouche, M. L. Zelditch, R. Cloutier, A critical appraisal of appendage disparity and homology in fishes. *Fish Fish.* **20**, 1138–1175 (2019).
60. Y. Hadzhiev, Z. Lele, S. Schindler, S. W. Wilson, P. Ahlberg, U. Strahle, F. Muller, Hedgehog signaling patterns the outgrowth of unpaired skeletal appendages in zebrafish. *BMC Dev. Biol.* **7**, 75 (2007).
61. J. Letelier, E. de la Calle-Mustienes, J. Pieretti, S. Naranjo, I. Maeso, T. Nakamura, J. Pascual-Anaya, N. H. Shubin, I. Schneider, J. R. Martinez-Morales, J. L. Gomez-Skarmeta, A conserved Shh cis-regulatory module highlights a common developmental origin of unpaired and paired fins. *Nat. Genet.* **50**, 504–509 (2018).
62. R. Freitas, G. Zhang, M. J. Cohn, Evidence that mechanisms of fin development evolved in the midline of early vertebrates. *Nature* **442**, 1033–1037 (2006).
63. R. Freitas, G. J. Zhang, M. J. Cohn, Biphasic *Hoxd* gene expression in shark paired fins reveals an ancient origin of the distal limb domain. *PLOS ONE* **2**, e754 (2007).
64. A. Minelli, The origin and evolution of appendages. *Int. J. Dev. Biol.* **47**, 573–581 (2003).
65. A. Force, M. Lynch, F. B. Pickett, A. Amores, Y. L. Yan, J. Postlethwait, Preservation of duplicate genes by complementary, degenerative mutations. *Genetics* **151**, 1531–1545 (1999).

66. J. H. Postlethwait, I. G. Woods, P. Ngo-Hazelett, Y. L. Yan, P. D. Kelly, F. Chu, H. Huang, A. Hill-Force, W. S. Talbot, Zebrafish comparative genomics and the origins of vertebrate chromosomes. *Genome Res.* **10**, 1890–1902 (2000).
67. C. T. Hittinger, S. B. Carroll, Gene duplication and the adaptive evolution of a classic genetic switch. *Nature* **449**, 677–681 (2007).
68. D. L. Stern, The genetic causes of convergent evolution. *Nat. Rev. Genet.* **14**, 751–764 (2013).
69. L. Chen, A. L. DeVries, C. H. Cheng, Convergent evolution of antifreeze glycoproteins in Antarctic notothenioid fish and Arctic cod. *Proc. Natl. Acad. Sci. U.S.A.* **94**, 3817–3822 (1997).
70. D. L. Stern, V. Orgogozo, The loci of evolution: How predictable is genetic evolution? *Evolution* **62**, 2155–2177 (2008).
71. L. Grande, W. E. Bemis, A comprehensive phylogenetic study of amiid fishes (Amiidae) based on comparative skeletal anatomy. an empirical search for interconnected patterns of natural history. *J. Vertebr. Paleontol.* **18**, 1–696 (1998).
72. T. Desvignes, A. Carey, I. Braasch, T. Enright, J. H. Postlethwait, Skeletal development in the heterocercal caudal fin of spotted gar (*Lepisosteus oculatus*) and other lepisosteiformes. *Dev. Dyn.* **247**, 724–740 (2018).
73. H. P. Schultze, G. Arratia, Reevaluation of the caudal skeleton of some actinopterygian fishes: II. Hiodon, Elops, and Albula. *J. Morphol.* **195**, 257–303 (1988).
74. G. Arratia, H.-P. Schultze, Reevaluation of the caudal skeleton of certain actinopterygian fishes: III. Salmonidae. Homologization of caudal skeletal structures. *J. Morphol.* **214**, 187–249 (1992).
75. E. J. Hilton, R. Britz, "The caudal skeleton of osteoglossomorph fishes, revisited: Comparisons, homologies, and characters" in *Origin and Phylogenetic Interrelationships of*

*Teleosts*, J. S. Nelson, H.-P. Schultze, M. V. H. Wilson, Eds. (Verlag Dr. Friedrich Pfeil, 2010), pp. 219–237.

76. D. F. Vaz, E. J. Hilton, The caudal skeleton of batrachoidiformes (Teleostei: Percomorphacea): A study of morphological diversity, intraspecific variation, and phylogenetic inferences. *Zool. J. Linn. Soc.* **189**, 228–286 (2020).
77. P. Thieme, P. Warth, T. Moritz, Development of the caudal-fin skeleton reveals multiple convergent fusions within Atherinomorpha. *Front. Zool.* **18**, 20 (2021).
78. W. A. Gosline, Some osteological features of modern lower teleostean fishes. *Smithson. Misc. Collect. Washingt.* **142**, 1–42 (1961).
79. K. Hoshino, Homologies of the caudal fin rays of Pleuronectiformes (Teleostei). *Ichthyol. Res.* **48**, 231–246 (2001).
80. M. Westerfield, *The zebrafish book: A guide for the laboratory use of zebrafish (Danio rerio)*. (Univ. of Oregon Press, ed. 4th, 2000).
81. C. B. Kimmel, W. W. Ballard, S. R. Kimmel, B. Ullmann, T. F. Schilling, Stages of embryonic development of the zebrafish. *Dev. Dyn.* **203**, 253–310 (1995).
82. E. O. Wiley, A. M. Fuiten, M. H. Doosey, B. K. Lohman, C. Merkes, M. Azuma, The caudal skeleton of the zebrafish, *Danio rerio*, from a phylogenetic perspective: A polyural interpretation of homologous structures. *Copeia* **103**, 740–750 (2015).
83. A. Bensimon-Brito, M. L. Cancela, A. Huysseune, P. E. Witten, The zebrafish (*Danio rerio*) caudal complex - a model to study vertebral body fusion. *J. Appl. Ichthyol.* **26**, 235–238 (2010).
84. H. Acloque, D. G. Wilkinson, M. A. Nieto, "Chapter 9 In Situ Hybridization Analysis of Chick Embryos in Whole-Mount and Tissue Sections" in *Avian Embryology, 2nd Edition*. (2008), pp. 169–185.

85. A. Muto, S. Ikeda, M. E. Lopez-Burks, Y. Kikuchi, A. L. Calof, A. D. Lander, T. F. Schilling, Nipbl and mediator cooperatively regulate gene expression to control limb development. *PLoS Genet.* **10**, e1004671 (2014).
86. C. Thisse, B. Thisse, High-resolution in situ hybridization to whole-mount zebrafish embryos. *Nat. Protoc.* **3**, 59–69 (2008).
87. A. Hruscha, P. Krawitz, A. Rechenberg, V. Heinrich, J. Hecht, C. Haass, B. Schmid, Efficient CRISPR/Cas9 genome editing with low off-target effects in zebrafish. *Development* **140**, 4982–4987 (2013).
88. W. Y. Hwang, Y. Fu, D. Reyon, M. L. Maeder, S. Q. Tsai, J. D. Sander, R. T. Peterson, J. R. Yeh, J. K. Joung, Efficient genome editing in zebrafish using a CRISPR-Cas system. *Nat. Biotechnol.* **31**, 227–229 (2013).
89. L. E. Jao, S. R. Wentz, W. Chen, Efficient multiplex biallelic zebrafish genome editing using a CRISPR nuclease system. *Proc. Natl. Acad. Sci. U.S.A.* **110**, 13904–13909 (2013).
90. M. A. Moreno-Mateos, C. E. Vejnar, J.-D. Beaudoin, J. P. Fernandez, E. K. Mis, M. K. Khokha, A. J. Giraldez, CRISPRscan: Designing highly efficient sgRNAs for CRISPR-Cas9 targeting in vivo. *Nat. Methods* **12**, 982–988 (2015).
91. T. Nakayama, I. L. Blitz, M. B. Fish, A. O. Odeleye, S. Manohar, K. W. Cho, R. M. Grainger, Cas9-based genome editing in *Xenopus tropicalis*. *Method. Enzymol.* **546**, 355–375 (2014).
92. S. Ansai, M. Kinoshita, Targeted mutagenesis using CRISPR/Cas system in medaka. *Biol. Open* **3**, 362–371 (2014).
93. E. L. Sorlien, M. A. Witucki, J. Ogas, Efficient production and identification of CRISPR/Cas9-generated gene knockouts in the model system *Danio rerio*. *J. Vis. Exp.*, e56969 (2018).

94. M. B. Walker, C. B. Kimmel, A two-color acid-free cartilage and bone stain for zebrafish larvae. *Biotech. Histochem.* **82**, 23–28 (2007).
95. E. H. Bryant, On use of logarithms to accommodate scale. *Syst. Zool.* **35**, 552–559 (1986).
96. P. Sordino, D. Duboule, T. Kondo, Zebrafish *Hoxa* and *Evx-2* genes: Cloning, developmental expression and implications for the functional evolution of posterior *Hox* genes. *Mech. Dev.* **59**, 165–175 (1996).
97. C. Thisse, B. Thisse, High throughput expression analysis of ZF-models consortium clones. *ZFIN Direct Data Submission.* (2005).
98. C. Patterson, "The contribution of paleontology to teleostean phylogeny" in *Major Patterns in Vertebrate Evolution*, M. K. Hecht, P. C. Goody, B. M. Hecht, Eds. (Plenum, 1977), vol. **14**, pp. 579–643.
99. P. M. Brito, Révision des Aspidorhynchidae (Pisces, Actinopterygii) du Mésozoïque: Ostéologie, relations phylogénétiques, données environnementales et biogéographiques. *Geodiversitas* **19**, 681–772 (1997).
100. H.-P. Schultze, G. Arratia, Reevaluation of the caudal skeleton of actinopterygian fishes: I. Lepisosteus and Amia. *J. Morphol.* **190**, 215–241 (1986).
101. G. Arratia, "The monophyly of Teleostei and stem-group teleosts" in *Mesozoic Fishes 2 – Systematics and Fossil Record*, G. Arratia, H.-P. Schultze, Eds. (Dr. Friedrich Pfeil, München, 1999), vol. 2, pp. 265–334.
102. G. Arratia, Basal teleosts and teleostean phylogeny. *Paleo Ichth.* **7**, 5–168 (1997).
103. G. Arratia, Remarkable teleostean fishes from the Late Jurassic of southern Germany and their phylogenetic relationships. *Mitt. Mus. Nat. Kd., Berl. Geowiss. Reihe* **3**, 137–179 (2000).

104. C. Patterson, D. E. Rosen, Review of ichthyodectiform and other Mesozoic teleost fishes, and the theory and practice of classifying fossils. *Bull. Am. Mus. Nat. Hist.* **158**, 81–172 (1977).
105. R. R. Betancur, E. O. Wiley, G. Arratia, A. Acero, N. Bailly, M. Miya, G. Lecointre, G. Orti, Phylogenetic classification of bony fishes. *BMC Evol. Biol.* **17**, 162 (2017).
106. E. Parey, A. Louis, J. Montfort, O. Bouchez, C. Roques, C. Iampietro, J. Lluch, A. Castinel, C. Donnadiou, T. Desvignes, C. Floi Bucuo, E. Jouanno, M. Wen, S. Mejri, R. Dirks, H. Jansen, C. Henkel, W. J. Chen, M. Zahm, C. Cabau, C. Klopp, A. W. Thompson, M. Robinson-Rechavi, I. Braasch, G. Lecointre, J. Bobe, J. H. Postlethwait, C. Berthelot, H. R. Crollius, Y. Guiguen, Genome structures resolve the early diversification of teleost fishes. *Science* **379**, 572–575 (2023).
